# Using epidemiological principles to explain fungicide resistance management strategies: why do mixtures outperform alternations?

James A.D. Elderfield<sup>1</sup>, Francisco J. Lopez-Ruiz<sup>2</sup>,  
Frank van den Bosch<sup>3</sup> and Nik J. Cunniffe<sup>1</sup>

<sup>1</sup> Department of Plant Sciences, University of Cambridge, Cambridge, CB2 3EA, UK.

<sup>2</sup> Curtin University, Centre for Crop and Disease Management, Department of Environment and Agriculture, Bentley, WA 6845, Australia

<sup>3</sup> Rothamsted Research, Harpenden, AL5 2JQ, UK.

*Corresponding author.* Nik Cunniffe ([nic1001@cam.ac.uk](mailto:nic1001@cam.ac.uk), +44 (0)1223 333954)

Twitter: @nikcunniffe

## ABSTRACT

- Whether fungicide resistance management is optimised by spraying chemicals with different modes of action as a mixture (i.e. simultaneously) or in alternation (i.e. sequentially) has been studied by experimenters and modellers for decades, largely inconclusively.
- We use previously-parameterised and validated mathematical models of wheat septoria leaf blotch and grapevine powdery mildew to test which strategy provides better resistance management, using the total yield before fungicide-resistance causes disease control to become economically-ineffective (“lifetime yield”) to measure effectiveness.
- Lifetime yield is optimised by spraying as much low-risk fungicide as is permitted, combined with slightly more high-risk fungicide than needed for acceptable initial disease control, applying these fungicides as a mixture. This is invariant to model parameterisation and structure, as well as the pathosystem in question. However if comparison focuses on other metrics, for example lifetime yield at full label dose, either mixtures or alternation can be optimal.
- Our work shows how epidemiological principles can explain the evolution of fungicide resistance, and highlights a theoretical framework to address the question of whether mixtures or alternation provide better resistance management. Our work also demonstrates that precisely how spray strategies are compared must be given extremely careful consideration.

**Keywords.** Fungicide resistance management, low-risk fungicide, high-risk fungicide, alternation, mixture, governing principles, lifetime yield, threshold-based control.

## INTRODUCTION

42  
43  
44  
45  
46  
47  
48  
49  
50  
51  
52  
53  
54  
55

Designing long-lasting, effective strategies to control plant disease remains a key challenge (Cunniffe *et al.*, 2015). Fungicide resistance management – optimising deployment to delay emergence or spread of resistant pathogen strains – has been studied for decades (Russell, 2005). Many strategies have been proposed. For a single fungicide, resistance management can be based on the method of application, changing the dose (van den Bosch *et al.*, 2011), the timing (van den Berg *et al.*, 2013), whether treatment is applied to the leaves or on the seed (Kitchen *et al.*, 2016), the spatial pattern of spraying (Parnell *et al.*, 2006), or the number of sprays (van den Berg *et al.*, 2016). However – for disease control as well as resistance management – fungicides with different modes of action are often combined in a spray programme (van den Bosch *et al.*, 2014b).

56  
57  
58  
59  
60  
61  
62  
63  
64  
65  
66  
67  
68  
69  
70  
71

Significant attention has therefore been devoted to how best to combine fungicides. Possibilities include a mixture, spraying the two fungicides at the same time; or as an alternation, applying sequentially. The risk of resistance development varies between fungicides (Brent & Hollomon, 2007). Resistance emerges to some chemicals within a few years of use, whilst others provide durable control for decades. We distinguish high-risk fungicides, to which resistance is already present or very likely to emerge, and low-risk fungicides, to which no significant resistance has yet been observed. We focus here on the case of mixture and alternation of a single high-risk fungicide with a single low-risk. Despite many experimental (Dovas *et al.*, 1976; Sanders *et al.*, 1985; Vali & Moorman, 1992; Lamondia, 2001; Cooke *et al.*, 2004) and modelling (Kable & Jeffery, 1980; Skylakakis, 1981; Josepovits & Dobrovolszky, 1985; Josepovits, 1989; Shaw, 1989a; Doster *et al.*, 1990; Birch & Shaw, 1997; Hobbelen *et al.*, 2011a, 2013) studies focusing on precisely this situation, no conclusive answer has emerged to the important but very simple question: does mixture or alternation provide better resistance management?

72  
73  
74  
75  
76  
77  
78  
79  
80

Although previous studies have led to equivocal results, mixtures have often been found to provide superior resistance management (van den Bosch *et al.*, 2014b). van den Bosch *et al.* (2014a) introduced a simple set of governing principles as a theoretical framework to synthesise these results, formalising previous concepts from the literature (Staub & Sozzi, 1983; Milgroom & Fry, 1988). These governing principles are based on constant rates of selection for resistance. We generalise this here, quantifying total selection for resistance by integrating a time-varying selection coefficient over time. The selection coefficient is defined as the difference in fitness between fungicide-sensitive and fungicide-resistant strains

81  
82  
83  
84

$$S = r_R - r_S, \quad 1$$

where  $r_R$  and  $r_S$  are the per capita growth rates of the resistant and sensitive pathogen strains, respectively. The total amount of selection for resistance is then given by the cumulative selection coefficient

85

$$\sigma = \int_0^T s(t) dt, \quad 2$$

86 in which  $T$  is the time of exposure to fungicide. Selection for resistance can therefore be  
87 reduced by decreasing both  $r_R$  and  $r_S$ , by decreasing  $r_R$  only, or by decreasing  $T$  (van den  
88 Bosch *et al.*, 2014a).

89  
90 The governing principles can be applied to the comparison between mixtures and  
91 alternation. Mixtures can reduce selection as the low-risk mixing partner suppresses  
92 growth rates of both sensitive and resistant pathogens strains. Mixtures may also permit  
93 the use of less high-risk fungicide, and decreasing differences in growth rate between  
94 strains. However, due to the concave shape of fungicide dose-response curves, mixtures  
95 experience a selective cost from “dose-splitting”. Splitting a dose of fungicide over  
96 multiple sprays increases the total effect on the pathogen and thus the selection pressure  
97 imposed (van den Bosch *et al.*, 2014a). Alternations can reduce selection by reducing the  
98 number of sprays of high-risk and thus the time of exposure. Our work here assesses in  
99 detail – for the first time – the impact of this trade-off between suppression from the mixing  
100 partner and dose-splitting.

101  
102 The structure of a mathematical model affects the conclusions to which it leads (Cunniffe  
103 *et al.*, 2012). Older models tended to collapse epidemics into exponential growth of  
104 fungicide-sensitive and fungicide-resistant strains (Kable & Jeffery, 1980; Skylakakis,  
105 1981; Shaw, 1989b). Complexity has subsequently gradually increased, reflecting  
106 general trends in plant disease epidemiology (Madden, 2006), using compartmental  
107 models to represent different classes of host tissue (Gubbins & Gilligan, 1999; Hall *et al.*,  
108 2004; Parnell *et al.*, 2005, 2006, Mikaberidze *et al.*, 2014, 2017). The current vogue  
109 emphasises detailed, system-specific models with seasonality in planting and harvesting,  
110 and a complex representation of the production of host tissue (Kitchen *et al.*, 2016; van  
111 den Berg *et al.*, 2016). What remains unclear is the extent to which divergent conclusions  
112 from previous modelling studies could be based on model structure. We therefore test  
113 how model structure affects our results. We also test the effect of pathosystem by  
114 repeating a selection of our analyses using models of two different systems. The bulk of  
115 our results are based on a model of septoria leaf blotch (caused by *Zymoseptoria tritici*)  
116 on winter wheat, but we test robustness using a model of powdery mildew (caused by  
117 *Erysiphe necator*) on grapevine. Both models have previously been parameterised and  
118 validated against field data (Burie *et al.*, 2011; Hobbelen *et al.*, 2011b).

119  
120 We use these models to compare alternation and mixtures of low- and high-risk  
121 fungicides. We address the following questions.

- 122 1) Is it better to apply two fungicides as a mixture, or as an alternation?
- 123 2) Does this depend on fungicide dose, and the level of disease control?
- 124 3) How can an optimal dose and spray programme be determined?
- 125 4) Are results conditioned on: i) values of parameters governing epidemiological rates  
126 and fungicide performance; ii) model structure; and iii) the pathosystem under  
127 consideration?

128 The governing principles are used throughout as a unifying theoretical framework to  
129 understand the results.

130

131

## DESCRIPTION

### 132 **Modelling fungicide**

#### 133 Application strategies

134 We compare three strategies.

- 135 1. Mixture. Both the high- and low-risk fungicide are applied at each spray.
- 136 2. Alternation High-Low. Alternate sprays of high- and low-risk, with high-risk sprayed  
137 first in each season.
- 138 3. Alternation Low-High. High- and low-risk alternate, with low-risk first.

139 Since each fungicide is sprayed twice as often when part of a mixture, we halve the dose  
140 to conserve the total amount of each chemical applied per season (van den Bosch *et al.*,  
141 2014a).

#### 142 Fungicide dynamics

143 Concentrations of both fungicides are set to zero at the start of each season. The  
144 concentration of a fungicide is sharply increased whenever it is sprayed; the timing  
145 depends on the pathosystem. Between sprays there is exponential decay

$$146 \quad \frac{dC}{dt} = -\delta C, \quad 3$$

147 in which the decay rate  $\delta$  depends on the fungicide.

#### 148 Epidemiological effects of fungicide and dose-response

149 The effect of a fungicide on a pathogen depends upon its mode of action, which differs  
150 between chemicals. Protectant fungicides are assumed to affect the pathogen's rate of  
151 infection, whereas eradicant fungicides affect the rate at which latently infected tissue  
152 becomes infectious (Hobbelen *et al.*, 2011b). Fungicides which act as a combined  
153 protectant and eradicant affect both rates.

154 The size of the effect upon the relevant rate parameter ( $\varepsilon$ ) depends upon the fungicide's  
155 concentration ( $C$ ) via an exponential dose-response curve (Hobbelen *et al.*, 2011b)

$$156 \quad \varepsilon(C) = \omega(1 - e^{-\theta C}). \quad 4$$

157 The parameters  $\omega$  (maximum effect) and  $\theta$  (curvature) vary between fungicides. For  
158 mixtures we assume independent action

$$159 \quad 1 - \varepsilon(C_1, C_2) = (1 - \varepsilon(C_1))(1 - \varepsilon(C_2)), \quad 5$$

160 in which  $C_1$  and  $C_2$  are the individual concentrations (Hobbelen *et al.*, 2011a).

## 161 **Modelling septoria leaf blotch on winter wheat**

### 162 Description of the model

163 We adapt a previously-validated, semi-discrete, compartmental model of septoria (*Z.*  
164 *tritici*) on winter wheat over successive growing seasons (Figure 1). Parameterisation of  
165 the model is described in Hobbelen *et al.* (2011a,b, 2013), in which the procedure for  
166 testing the fitted model against field data is also reported. The set of equations defining  
167 the model are given in Methods S1, and we concentrate here on summarising important  
168 features.

169  
170 The model tracks the leaf area index (LAI), the area of leaf per unit area of ground, for  
171 the upper five leaves of wheat plants (van den Berg *et al.*, 2016). The model distinguishes  
172 healthy, uninfected leaf tissue (**S**usceptible) from different classes of infectious tissue:  
173 latently-infected (**E**xposed), sporulating (**I**nfectious) and dead (**R**emoved). The dynamics  
174 of resistance is tracked by separating fungicide-sensitive and fungicide-resistant leaf  
175 tissue (for example, splitting the infectious compartment into  $I_R$  and  $I_S$ ).

176  
177 There are large variations in the LAI presented by a wheat crop over a single season, and  
178 this affects epidemiological dynamics (Cunniffe *et al.*, 2015). The model accounts for this  
179 by including time-dependent rates of production of healthy tissue and of natural leaf  
180 senescence. The model also accounts for decaying inoculum on lower leaves (**P**rimary),  
181 which initiates seasonal epidemics on the upper leaves. The amount of tissue in each  
182 compartment is reset to its initial value at the beginning of each season, with the ratio of  
183 fungicide-resistant to fungicide-sensitive inoculum set according to the corresponding  
184 ratio in the infectious compartments at the end of the previous year (or to the assumed  
185 initial frequency of resistance in the first year).

### 186 Fungicide effects and timing

187 We follow Hobbelen *et al.* (2011a) in taking pyraclostrobin as the high-risk fungicide and  
188 chlorothalonil as the low-risk fungicide. We assume that pyraclostrobin acts as a  
189 combined protectant and eradicant, but that chlorothalonil has only protectant activity. We  
190 consider two applications of fungicide per season, with a T1 spray at Zadoks growth stage  
191 32 and a T2 spray at growth stage 39. This is representative of those used in winter wheat  
192 growing areas (Paveley *et al.*, 2014).

### 193 Calculating yield

194 We estimate the relative yield ( $Y$ ) by integrating the amount of photosynthetically-active  
195 leaf area over a critical period for grain formation (Waggoner & Berger, 1987; Gooding &  
196 Dimmock, 2000)

$$197 \quad Y = \frac{\int_{T_{GS61}}^{T_{GS87}} (S(t) + E_R(t) + E_S(t)) dt}{\int_{T_{GS61}}^{T_{GS87}} S_{\text{disease-free}}(t) dt} \times 100\%. \quad 6$$

198 The denominator normalises the yield to that obtained from a disease-free crop.

## 199 **Strategy performance**

200 The goal of any anti-resistance strategy is maintaining effective disease control. However,  
201 this begs a question: what level of control is effective? We define a threshold level of  
202 disease beyond which management is considered to have failed, taking a 5% yield loss  
203 as the critical level growers will tolerate (Hobbelen *et al.*, 2011a). The effective lifetime of  
204 the high-risk fungicide (the “usefulness time” of van den Bosch & Gilligan, (2008)) is  
205 defined as the number of seasons until this critical yield loss occurs.

206 We use the following metrics.

- 207 • **Selection ratio (SR)**. Proportional increase in the frequency of resistance over the  
208 first season, i.e. the proportion of the total infectious tissue ( $I_R + I_S$ ) infected by the  
209 resistant strain ( $I_R$ ). This measures the rate at which fungicide-resistance spreads  
210 initially.
- 211 • **Lifetime yield (LY)**. Total within-season yield over the entire effective lifetime. This  
212 allows strategies that have similar effective lives but differences in within-season  
213 performance to be distinguished.

214 Comparison of strategies depends on the metric. For selection, we define  $Z = SR_{ALT} /$   
215  $(SR_{ALT} + SR_{MIX})$ , in which  $SR_{ALT}$  is the selection ratio of the best-performing of the two  
216 alternation strategies, and  $SR_{MIX}$  is that of mixtures. Since smaller values of the selection  
217 ratio are superior, values of  $Z$  lower than 0.5 indicate alternation is preferred. For lifetime  
218 yield, larger values indicate a better performing strategy, and we preserve the  
219 directionality of the  $Z$ -metric by instead defining  $Z = LY_{MIX} / (LY_{ALT} + LY_{MIX})$ , again using  
220 the best-performing alternation strategy in the comparison.

## 221 **Effect of model structure**

222 We check the robustness of our results to the set of mechanisms included in the  
223 underlying epidemic model. We identify three components that could be significant.

- 224 1. **Host-limited infection**. The density of host tissue is modelled in some detail, with  
225 a complex time-dependent function representing production of susceptible host  
226 tissue, whereas simpler models often use exponential growth.
- 227 2. **Latent period**. New infections only become infectious after a latent period,  
228 whereas in simpler models infected tissue becomes infectious immediately.
- 229 3. **Phenology**. The model includes a complex treatment of within-season timing, with  
230 primary inoculum from lower leaves initiating upper leaf epidemics, and also the  
231 senescence of living leaf tissue. These features are absent from the simpler  
232 models.

233 These complexities are sequentially taken out of the model and analyses re-run (Methods  
234 S2).

## 235 **Effect of pathosystem**

### 236 Modelling powdery mildew on grape

237 As a further test of robustness, we repeat a selection of analyses using a model of  
238 powdery mildew (*E. necator*) on grapevine (Burie *et al.*, 2011) (Figure 2). In addition to

239 being parameterised to match the grapevine powdery mildew pathosystem, there are  
240 three additional differences in model structure in comparison to the septoria model.

- 241 1. There is no primary inoculum compartment, and epidemics are instead initiated by  
242 a small amount of tissue being set to be latently infected (i.e. exposed) at the start  
243 of each season.
- 244 2. An additional compartment is included in the model, accounting for leaves  
245 developing Ontogenic resistance by virtue of age.
- 246 3. The model includes shoot-topping, in which upper shoots are removed to  
247 encourage secondary shoot growth.

248 Full details of the model – and its parameterisation – are in Methods S3.

### 249 Fungicide effects and timing

250 For powdery mildew we model trifloxystrobin as the high-risk fungicide, and sulphur as  
251 the low-risk fungicide, assuming both chemicals combine protectant and eradicant modes  
252 of action (Reuveni, 2001). We assume flowering occurs at day 163 of the season  
253 (Mammeri *et al.*, 2014), and that spraying is done either side of this, two days before and  
254 twelve days after flowering. This is a smaller number of sprays than normally used in  
255 French viticulture (Calonnec *et al.*, 2006; Savary *et al.*, 2009), although it is within the  
256 range leading to acceptable control (Gadoury *et al.*, 2003).

### 257 Effective lifetime and yield

258 The Burie *et al.* (2011) model tracks the severity of powdery mildew on grapevine leaves.  
259 However, prices obtained by a grower would depend on a combination of yield and grape  
260 quality for winemaking. Effects of leaf infection upon yield and quality are complex (Pool  
261 *et al.*, 1984; Calonnec *et al.*, 2004). Quantifying fine details of this would require a more  
262 detailed treatment than appropriate here. However, there is a strong positive correlation  
263 between leaf infection and berry infection (Calonnec *et al.*, 2006; Delière *et al.*, 2015). We  
264 therefore simply use the level of leaf infection as a proxy for yield, taking 3% as the critical  
265 threshold on the peak level of berry infection within 30 days of flowering beyond which  
266 control is considered to have broken down, since berries are almost entirely resistant after  
267 this period (Gadoury *et al.*, 2003). Similarly stringent thresholds are used in French  
268 viticulture (Deliere *et al.*, 2010). We then set the equivalent of lifetime yield to be the  
269 effective lifetime of the high-risk fungicide, i.e. the number of seasons until this critical  
270 threshold is exceeded.

271

272

## RESULTS

### 273 Initial disease control at full doses

274 For septoria and applying full doses of both fungicides, all three strategies lead to  
275 adequate control in the first season (yield >95% of the disease-free yield) (Figure 3a).  
276 Optimal initial control is obtained under mixture (~97.4% yield), with lower yields from  
277 both alternation strategies (~96.0% and ~96.4% for low-high and high-low, respectively).  
278 The first-season yield is highest for mixtures because of the concave dose response  
279 curve, with diminished returns from increased concentrations. Spraying half the dose  
280 twice as often therefore leads to better control (recall full dose corresponds to half dose  
281 in both sprays under mixture). The alternation high-low strategy slightly outperforms the

282 low-high strategy in the first season since the high-risk fungicide is assumed more  
283 efficacious (maximum effect  $\omega_H = 1.0 > 0.48 = \omega_L$ ). All other things being equal, control  
284 is improved by applying the high-risk fungicide earlier, since it then targets the pathogen  
285 when its relative growth rate is larger.

### 286 Evolution of resistance at full doses

287 For all three strategies, there is a sharp breakdown of control after ~15 seasons (Figure  
288 3a). This is driven by a rapid increase in the proportion of the resistant strain, which  
289 increases sigmoidally from being practically undetectable (<1%) to near fixation (>99%)  
290 within one or two growing seasons (Kable & Jeffery, 1980) (Figure 3b). Disease control  
291 then rests entirely on the low-risk fungicide, and all three strategies become ineffective  
292 (i.e. yield <95%). Due to dose-splitting and the concave dose-response curve, when  
293 resistance is at high frequency the best yield is then obtained under mixtures (Figure 3a),  
294 although this level of control is not economically-viable. The improved performance of the  
295 low-high strategy relative to high-low alternation after resistance has taken over is again  
296 due to timing: control is improved by applying the sole effective fungicide earlier.

297  
298 Although the timing of the sharp increase in the frequency of fungicide-resistant pathogen  
299 is similar for all three strategies, it occurs earliest for mixtures then for alternation high-  
300 low then for low-high (Figures 3a and b). This is precisely the order of the efficacy of the  
301 strategies for disease control in the first season. Applying fungicides as a mixture leads  
302 to slightly more effective disease control, but – in part as a consequence of this – exerts  
303 a stronger selective pressure. Considered over the effective lifetime, the alternation low-  
304 high strategy therefore has the highest lifetime yield (Figure 3c). At full dose, however,  
305 differences between the strategies are relatively minor.

### 306 Responses of selection and lifetime yield to dose

307 Full dose results illustrate disease control and selection are closely related. We therefore  
308 consider performance over a range of dose combinations, identifying how to select a pair  
309 of doses – as well as spray strategy – to optimally balance control vs. selection. For  
310 selection, there are dose combinations favouring both alternation and mixtures (Figure  
311 4a). Alternation exerts less selection than mixtures at higher doses of high-risk ( $C_H$ ). The  
312 concave dose-response means that at high doses the effect on pathogen growth rates of  
313 the half dose under mixture approaches that of full dose under alternation. However,  
314 under mixture this dose is applied twice as often, and selection occurs for longer.  
315 Conversely, at higher doses of the low-risk fungicide ( $C_L$ ), mixtures tend to be preferred,  
316 since alternation receives no suppression of pathogen growth rate from the low-risk at the  
317 time the high-risk fungicide is applied.

318  
319 Patterns in lifetime yield are more complex (Figure 4b). There is a region of dose-space  
320 (hatch-shaded grey) within which no strategy leads to sufficient control even before  
321 resistance has spread. This outcome is associated with low doses of both chemicals,  
322 although even at full dose of low-risk, some high-risk is required (recall the high-risk  
323 chemical is the more efficacious). There is an intermediate region (shaded dark green)  
324 within which – at the same doses of both chemicals for each strategy – effective control  
325 is only possible under mixture because of dose-splitting. For larger doses of both  
326 chemicals either mixtures (shaded light green) or one of the alternation strategies (shaded



327 light brown) can have the best performance, or there can be approximately equal lifetime  
328 yields (within 1%; shaded white).

### 329 Selecting an optimum strategy and dose

330 The largest lifetime yield over all strategies and pairs of doses is marked with the red  
331 arrow on Figure 4b. It corresponds to spraying a mixture of a full dose of low-risk with a  
332 dose of high-risk slightly larger than that required for economically-acceptable yield in the  
333 first season. As the low-risk fungicide exerts no selection, it is unsurprising that the  
334 maximal permissible amount of low-risk should be optimal, since this allows the smallest  
335 amount of high-risk to be applied while maintaining acceptable disease control. However,  
336 it is less obvious why the optimal strategy should be to apply the high-risk fungicide as  
337 part of a mixture, and why this particular dose of high-risk (i.e. just above the amount  
338 required to ensure effective control) is required.

339  
340 We therefore examine responses to the dose of high-risk ( $C_H$ ) with the low-risk fixed at  
341 full dose (Figures 4c-e). This corresponds to the vertical line in dose-space  $C_L = 1.0$  in  
342 Figures 4a and b. As already noted, for a given value of  $C_H$ , mixture leads to the best  
343 initial disease control because of the beneficial effect of dose-splitting (Figure 4c). The  
344 implication is that lower  $C_H$  can maintain adequate control under mixtures ( $C_H \geq 0.29$ ;  
345 dashed line in Figure 4c) compared to alterations ( $C_H \geq 0.44$  or  $0.56$ ). The pattern for the  
346 level of selection to  $C_H$  is more complex, with both mixture and alternation potentially  
347 leading to smaller selection ratios at different  $C_H$  (Figure 4d).

348  
349 To understand optimum performance in more detail, we compare the selection ratios at  
350 the low end of permissible doses for each strategy, since these maximise lifetime yields  
351 (Figure 4e). For the model and parameterisation used here, the lower permissible dose  
352 under mixture outweighs the effect of spraying high-risk twice as often, and exerts less  
353 selection than the lowest permissible doses under either alternation (at 95% yield in the  
354 first season,  $SR = 2.28$  for mixture vs.  $3.08$  and  $3.15$  for alternation high-low and low-high,  
355 respectively). The lower selection ratio leads to a longer effective lifetime, and spraying  
356 the fungicides as a mixture optimises lifetime yield.

357  
358 The optimal dose of the high-risk fungicide ( $C_H$ ) is slightly higher than the minimum  $C_H$   
359 ensuring acceptable control in the first season. This is because the effective lifetime is  
360 discrete, leading to ranges of  $C_H$  which all break down within the same season. Within  
361 any range of doses with the same effective lifetime, the optimum lifetime yield is obtained  
362 by selecting a higher  $C_H$ , benefitting from slightly improved control in each season it  
363 remains effective. Too high a  $C_H$  however can lead to more dramatic failure in the final  
364 season, and thus the optimal  $C_H$  may not be the highest dose with the longest effective  
365 life. This is difficult to see in Figure 4e, but the “horizontal” parts of the response are not  
366 quite horizontal. The red arrow on Figure 4b is therefore above the boundary between the  
367 grey and dark-green regions.

### 368 Balancing selection and control

369 We further dissect the trade-off between selection and control by considering equal doses  
370 of high- and low-risk (Figures 5a-e), corresponding to a different visualisation of results  
371 underpinning the line  $C_H = C_L$  in Figures 4a and/or 4b. For all three strategies, as the dose

372 of high- (and low-) risk is increased, both the first season yield (Figure 5a) and selection  
373 ratio (Figure 5b) increase. However, dose-splitting means that viable control is again  
374 retained under mixtures at much lower doses. The overall maximum lifetime yield is  
375 therefore under mixtures ( $LY = 19.1$ ,  $C_L = C_H = 0.5$ ) (Figure 5c). Strategies can be  
376 normalised against each another by replotting the selection ratio and lifetime yield as a  
377 function of the first season yield (Figures 5d and e). This reiterates that – at least at the  
378 same level of initial disease control and using equal proportions of both chemicals –  
379 mixtures leads to less selection (Figure 5d) and a larger lifetime yield (Figure 5e).  
380 Differences between strategies are small, however.

381  
382 Examining responses of selection and control to first season yield is a convenient  
383 mechanism to allow results at all doses – not just when  $C_H = C_L$  – to be visualised (Figures  
384 5f-h). For any given initial level of control, mixtures can produce higher lifetime yields and  
385 lower selection ratios (Figures 5f and 5g). However, mixtures can also produce lower  
386 yields and higher selection ratios. The variation in selection and yield for a given level of  
387 control is therefore much larger with mixtures than with either alternation. Examining  
388 strategies that have the same initial disease control shows that mixtures can produce any  
389 particular effective lifetime at much lower  $C_H$ . This is shown in Figure 5h, which – for the  
390 ranges of doses of both fungicides under all three strategies which lead to first season  
391 yields between 95.45% and 95.55% – shows values of  $C_H$  leading to each effective  
392 lifetime (i.e. a vertical slice through the data underpinning Figure 5g).

### 393 Effect of epidemiological and fungicide parameters

394 Results thus far correspond to a single model parameterisation. We test robustness by  
395 altering values of a number of key parameters. In all cases the dose of low-risk fungicide  
396 is fixed to be maximal (i.e.  $C_L = 1.0$ ), as we have identified no mechanism by which  
397 changing parameter values can cause this not to be optimal. We then consider the  
398 response of lifetime yield to changing  $C_H$ .

399  
400 As an example, we examine in some detail the effect of the infection rate ( $\beta$ ) (Figure 6a).  
401 If  $\beta$  is made significantly larger than the default, all three strategies fail to give sufficient  
402 control at any  $C_H$  (dark-grey hatching). If  $\beta$  is made sufficiently smaller, then control can  
403 be maintained indefinitely through the low-risk fungicide alone (light-grey hatching). Both  
404 cases are unrealistic. Within the realistic range of values of  $\beta$ , exactly the same pattern is  
405 seen as before. At low  $C_H$ , no spray strategy can provide effective control. At slightly  
406 higher  $C_H$  mixtures perform best. At the highest  $C_H$  alternation performs better, although  
407 for large infection rates this might require  $C_H > 1.0$  (i.e. a dose above the permissible  
408 maximum label dose). As  $\beta$  is increased, the threshold  $C_H$  at which mixtures first become  
409 effective shifts upwards, as more fungicide is required to provide acceptable disease  
410 control.

411  
412 The optimal dose is always lower for mixtures than either of the alternations (Figure 6b;  
413 the saw-tooth pattern is because the effective lifetime is discrete). The corresponding  
414 optimal lifetime yield is always larger under mixture (Figure 6c), and – for all strategies –  
415 corresponds to selecting  $C_H$  close to the threshold required for effective first season  
416 control (Figure 6d). For all values of the infection rate,  $\beta$ , the optimal strategy is therefore

417 again to spray a little more high-risk fungicide than required for effective control in the first  
418 season, and to do so under mixture.

419  
420 The pattern is consistent for all parameters tested in our sensitivity analysis (Figure 7).  
421 For parameters which cause disease to spread faster as they are increased, more high-  
422 risk fungicide is required for effective control, and the characteristic pattern shifts upward  
423 (Figures 7c and f). Conversely, for parameters for which an increase leads to decreased  
424 rates of disease spread, a smaller amount of high-risk is permissible (Figures 7a, b, d, e  
425 and g). Changing the initial frequency of resistance has a negligible effect on the relative  
426 performance of the strategies in the first season, for both resistance management and  
427 yield. However at higher initial levels of resistance, control fails sooner, increasing the  
428 importance of disease control in the earlier seasons for the lifetime yield and thus  
429 favouring mixture (Figure 7h).

#### 430 Effect of model structure

431 To facilitate inter-model comparison, we return to comparing strategies in dose-space.  
432 The simplest model – with both pathogen strains growing exponentially – is similar to  
433 models used in the early fungicide resistance modelling literature (Delp, 1980; Kable &  
434 Jeffery, 1980; Skylakakis, 1981). Indeed, if we additionally assume fungicides do not  
435 decay, an analytical prediction of which strategy leads to better resistance management  
436 at a given pair of doses can be generated (Methods S4). The other models are too  
437 complicated for mathematical analysis, although the same pattern is seen for selection in  
438 dose-space in every model (Figure 8). The only real differences between models are the  
439 slightly larger regions within which alternation provide better resistance management  
440 when models include a latent period. When a latent period is not included, the high-risk  
441 fungicide loses its eradicant mode of action, and so becomes generally less efficacious.  
442 As with dose and fungicide parameter values, less effect from the high-risk fungicide then  
443 favours mixture.

444  
445 In the models that include host-limited infection, and thus the loss of host tissue to  
446 disease, we also investigate how predictions of lifetime yield are affected by model  
447 structure (Figure 9). Predictions vary between models, which is perhaps unsurprising  
448 given the additional complexity underlying the yield metric. However, although the  
449 patterns vary, the characteristic pattern in dose-space is conserved. At low  $C_H$  both  
450 strategies fail to give acceptable yield, at slightly higher doses mixtures out-perform  
451 alternation, and at the highest doses alternation out-performs mixture. Exactly as before,  
452 the optimal strategy is therefore again to spray a little more high-risk fungicide than is  
453 required for effective control in the first season, and to do so under mixture (the bright  
454 green saw-tooth lines on Figure 9).

#### 455 Effect of pathosystem

456 Results for powdery mildew are similar to those for septoria for both comparisons in dose-  
457 space, with alternation performing better at higher doses of the high-risk fungicide in  
458 terms of both resistance management and long-term yield (Figures 10a and 10b).  
459 Mixtures perform increasingly well for selection if  $C_L$  is increased, while the yield metric  
460 produces more complicated patterns, again as before. Compared to the septoria model,  
461 the boundary between the areas where mixture and alternation perform better for

462 selection curves in the opposite direction; concave upward rather than downward  
463 (compare Figure 10a with Figure 4a). This is because the maximum effectiveness of the  
464 low-risk in the powdery mildew model is larger than its counterpart in the septoria model  
465 (*cf.* analytic predictions from the simple exponential growth model, Methods S4). Again,  
466 at full dose of both fungicides the superior strategy for both resistance management and  
467 long-term yield is Alternation Low-High.

468  
469 However, when normalising strategies by the level of initial control (Figures 10c and 10d),  
470 mixtures are again capable of generating lower selection pressures and higher effective  
471 lives. Compared to septoria, the alternation strategies have less overlap in their  
472 performance and the worst-yielding mixture strategies are much more similar to the worst-  
473 yielding alternation. Nevertheless, the key result is that the overall optimal strategy for  
474 long-term yield is – yet again – to apply as much low-risk as possible, combined with  
475 slightly more high-risk than needed for an acceptable initial level of disease control, and  
476 to do so under mixture.

477

## 478 DISCUSSION

479

480 We considered resistance management of a fungicide at high-risk of resistance,  
481 comparing performance of combining the high-risk chemical with a low-risk fungicide  
482 sprayed as either a mixture or in alternation. We assessed performance via the lifetime  
483 yield before control breaks down due to fungicide resistance, performing four distinct  
484 comparisons. The simplest comparison considered full label doses of both chemicals. For  
485 septoria, the largest lifetime yield was obtained by spraying in alternation, although the  
486 improvement relative to mixture was relatively small (Figures 3 and 4a and 4b).  
487 Alternation was also optimal at full doses in our model of grapevine powdery mildew  
488 (Figures 10a and 10b). While performance at full doses of both chemicals is a simple  
489 comparison, it is now common practice in some countries for fungicides to be used at  
490 lower doses (Jørgensen *et al.*, 2017). Additionally, the comparison depends strongly on  
491 model parameterisation. By altering values of epidemiological and/or fungicide-  
492 performance parameters, either mixtures or alternation can optimise lifetime yield at full  
493 dose (*cf.* changes in colour along the top of individual panels in Figure 7). The set of  
494 mechanisms included in the underlying epidemiological model can also affect whether  
495 alternation or mixture is the best strategy (note how closely regions shaded light-green  
496 approach the points at which  $C_H = C_L = 1.0$  in some panels of Figure 9). Results of the  
497 full dose comparison are therefore equivocal, being system-, model-, and parameter-  
498 specific. There is also no guarantee that larger lifetime yields would not be obtained by  
499 spraying smaller amounts of fungicide, due to the smaller amount of selection that would  
500 thus be exerted.

501

502 Our second comparison therefore considered performance across all pairs of permissible  
503 doses. There are regions of dose-space within which alternations and mixtures each  
504 optimise lifetime yield (Figure 4b). The broad pattern in dose-space is robust to model  
505 structure (Figures 8 and 9) and pathosystem (Figures 10a and b). An underlying driver of  
506 the variation in performance at different doses is – when normalising by the applied doses  
507 – that different strategies lead to varying levels of disease control in the absence of

508 resistance (Figures 4c and 5a). An alternate normalisation – as in our third comparison –  
509 accounts for this by selecting combinations of pairs of fungicide doses for each strategy  
510 that lead to identical initial levels of control (Figure 5f and 5g). The effective lifetime and  
511 so lifetime yield for any given level of disease control then depends strongly on the  
512 amount of high-risk fungicide that is sprayed (Figure 5h). Since the low-risk chemical  
513 exerts no selection in our model, it is optimal to include as much low-risk fungicide as  
514 possible in any spray programme, and to combine this with as little high-risk fungicide as  
515 provides effective control (Figures 4b and 10b). Arguably this is unsurprising (Shaw,  
516 2006), but focuses our attention on identifying the strategy which has the longest effective  
517 lifetime, and so the largest lifetime yield.

518  
519 For this fourth and final comparison, for both pathosystems we considered (Figures 4b  
520 and 10b), and for all model parameterisations (Figures 6 and 7) and sets of  
521 epidemiological mechanisms (Figure 9) we tested, the maximum effective lifetime was  
522 obtained when fungicides were sprayed as a mixture. We found it was then always  
523 optimal to apply a full dose of low-risk mixed with close to the minimal dose of high-risk  
524 that retains effective control when there is no resistant pathogen. This optimises the  
525 lifetime yield (red arrows in Figures 4b and 10b, and red lines in Figure 7). This spray  
526 programme represents the true optimum of all strategies we considered.

527  
528 Mathematical models of whether alternations or mixtures are better for fungicide-  
529 resistance management have been developed for decades. In the early literature whether  
530 mixtures provided any benefit beyond allowing a reduction in dose was contentious, and  
531 without explicit consideration of dose-response curves, the cost of dose-splitting was not  
532 obvious. The recent formalisation of the governing principles has allowed us to clearly  
533 disentangle the mechanisms driving the effect of mixtures on selection. The other major  
534 distinguishing feature of our work is our extensive sensitivity analysis to model  
535 parameterisation as well as the pathosystem that is modelled. We also tested – via our  
536 structural sensitivity analysis to model structure – how the set of epidemiological  
537 mechanisms included in the underlying model affected our conclusions. It is remarkable  
538 that the optimum over all strategies was independent of all of these factors.

539  
540 However, arguably the most important aspect of our work is that we have provided a  
541 concrete explanation for our observations, showing how the governing principles  
542 introduced by Milgroom & Fry (1988) and more recently formalised by van den Bosch *et*  
543 *al.* (2014a) can explain the behaviour. The driving mechanism underpinning the relative  
544 success of mixtures is that dose-splitting of the low-risk fungicide gives better background  
545 disease control and permits a lower dose of high-risk to be used. The growth rate of the  
546 pathogen when the high-risk is applied is also suppressed by the low-risk, reducing  
547 selection further. For the set of models and parameterisations tested here these effects  
548 outweigh the negative effect of the high-risk chemical spraying twice as often. While we  
549 have not – and in general cannot – prove this will happen in all parameterisations of all  
550 models of all structures for all pathosystems, taken collectively our results provide very  
551 good evidence that applying fungicides as mixtures will be the best resistance  
552 management strategy in a range of situations. Furthermore, for a set of 1000 parameter  
553 sets in which each parameter was sampled uniformly at random from the ranges shown

554 in Figure 7, no case was found where mixture did not provide an overall better lifetime  
555 yield than alternation. (Methods S5).

556  
557 The majority of our results are explained by dose-splitting and suppression by the mixing  
558 partner, both of which are simply explained by the governing principles. However, the fact  
559 that the two alternation strategies do not perform identically – and that these two  
560 strategies differ only in the order in which high-risk and low-risk chemicals are applied –  
561 shows that timing of fungicide application can also be important. These can likely also be  
562 explained by the governing principles, but with greater difficulty due to the non-trivial  
563 interactions between the end of the season, the growth rate of the pathogen at any given  
564 time, and the critical period for yield formation. We have therefore not pursued these  
565 differences here.

566  
567 While we have identified how the optimal strategy and combination of doses could be  
568 selected, there are potentially issues in adopting our prescribed strategy. The first  
569 difficulty is that it requires the threshold between effective and ineffective control to be  
570 unambiguously identified. Given the high level of year-on-year variability typical of real  
571 disease systems (te Beest *et al.*, 2008) and the extent to which available models do not  
572 necessarily capture the complex dynamics of epidemics accurately enough to make such  
573 a precise prediction (Gent *et al.*, 2013), this might be rather difficult in practice. There  
574 would also be questions raised surrounding the risk-aversion of growers and/or  
575 agronomists, who might – reasonably enough – wish to use higher doses of fungicides  
576 than are necessary on average to avoid failure of control in years with high disease  
577 pressures (Jørgensen *et al.*, 2017), although in principle this might be mitigated via a  
578 sufficiently well-calibrated decision support system (Carisse *et al.*, 2010). We have also  
579 not considered the economic aspects of our recommendations (te Beest *et al.*, 2013), nor  
580 the potentially confounding effects of varying the timing of fungicide sprays (van den Berg  
581 *et al.*, 2013, 2016), nor the emergence phase of resistance (Hobbelen *et al.*, 2014;  
582 Mikaberidze *et al.*, 2017), nor of spatial heterogeneity in coverage (Shaw, 2000; Parnell  
583 *et al.*, 2005, 2006). Nevertheless, by showing in detail and for the first time how fungicide  
584 anti-resistance strategies should properly be compared, as well as by showing how  
585 results of such comparisons can be explained using simple and intuitive epidemiological  
586 principles, our work has developed a firm base to which these complexities can be added.  
587 Our future work will do this, albeit with the expectation that mixtures will very often be the  
588 better strategy.

## 589 **Acknowledgements**

591 JADE acknowledges the BBSRC for support via a University of Cambridge DTP PhD  
592 studentship. Rothamsted Research receives support from the Biotechnology and  
593 Biological Sciences Research Council (BBSRC) of the United Kingdom.

## 594 **Author contributions**

596 JADE, FvdB and NJC conceived and designed the research. JADE performed the  
597 experiments and analysed the data. JADE and NJC wrote the paper, with input from FvdB  
598 and FJL-R.

599  
600

## LITERATURE CITED

- 601 **te Beest DE, Paveley ND, Shaw MW, van den Bosch F. 2008.** Disease-weather relationships for  
602 powdery mildew and yellow rust on winter wheat. *Phytopathology* **98**: 609–617.
- 603 **te Beest DE, Paveley ND, Shaw MW, van den Bosch F. 2013.** Accounting for the economic risk caused  
604 by variation in disease severity in fungicide dose decisions, exemplified for *Mycosphaerella graminicola*  
605 on winter wheat. *Phytopathology* **103**: 666–72.
- 606 **van den Berg F, van den Bosch F, Paveley ND. 2013.** Optimal fungicide application timings for disease  
607 control are also an effective anti-resistance strategy: a case study for *Zymoseptoria tritici* (*Mycosphaerella*  
608 *graminicola*) on wheat. *Phytopathology* **103**: 1209–19.
- 609 **van den Berg F, Paveley ND, van den Bosch F. 2016.** Dose and number of applications that maximize  
610 fungicide effective life exemplified by *Zymoseptoria tritici* on wheat - a model analysis. *Plant Pathology*  
611 **65**: 1380–1389.
- 612 **Birch CPD, Shaw MW. 1997.** When can reduced doses and pesticide mixtures delay the build-up of  
613 pesticide resistance? A mathematical model. *Journal of Applied Ecology* **34**: 1032–1042.
- 614 **van den Bosch F, Gilligan CA. 2008.** Models of fungicide resistance dynamics. *Annual Review of*  
615 *Phytopathology* **46**: 123–47.
- 616 **van den Bosch F, Oliver R, van den Berg F, Paveley N. 2014a.** Governing principles can guide  
617 fungicide-resistance management tactics. *Annual Review of Phytopathology* **52**: 175–195.
- 618 **van den Bosch F, Paveley N, van den Berg F, Hobbelen P, Oliver R. 2014b.** Mixtures as a Fungicide  
619 Resistance Management Tactic. *Phytopathology* **104**: 1264–1273.
- 620 **van den Bosch F, Paveley N, Shaw M, Hobbelen P, Oliver R. 2011.** The dose rate debate: does the  
621 risk of fungicide resistance increase or decrease with dose? *Plant Pathology* **60**: 597–606.
- 622 **Brent KJ, Hollomon DW. 2007.** *Fungicide resistance: the assessment of the risk.*
- 623 **Burie J, Langlais M, Calon nec A. 2011.** Switching from a mechanistic model to a continuous model to  
624 study at different scales the effect of vine growth on the dynamic of a powdery mildew epidemic. *Annals*  
625 *of Botany* **107**: 885–895.
- 626 **Calon nec A, Cartolar P, Poupot C, Dubourdi eu D, Darriet P. 2004.** Effects of *Uncinula necator* on the  
627 yield and quality of grapes (*Vitis vinifera*) and wine. *Plant Pathology* **53**: 434–445.
- 628 **Calon nec A, Cartolaro P, Delière L, Chadoeuf J. 2006.** Powdery mildew on grapevine: the date of  
629 primary contamination affects disease development on leaves and damage on grape. *IOBC/WPRS*  
630 *Bulletin* **29**: 67–73.
- 631 **Carisse O, Tremblay D-M, Jobin T, Walker A. 2010.** Disease decision support systems: their impact on  
632 disease management and durability of fungicide effectiveness. *Fungicides*. Chapter 9.
- 633 **Cooke LR, Locke T, Lockley KD, Phillips AN, Sadiq MDS, Coll R. 2004.** The effect of fungicide  
634 programmes based on epoxiconazole on the control and DMI sensitivity of *Rhynchosporium secalis* in  
635 winter barley. *Crop Protection* **23**: 393–406.
- 636 **Cunniffe NJ, Koskella B, Metcalf CJE, Parnell S, Gottwald TR, Gilligan CA. 2015.** Thirteen challenges  
637 in modelling plant diseases. *Epidemics* **10**: 6–10.
- 638 **Cunniffe NJ, Stutt ROJH, van den Bosch F, Gilligan CA. 2012.** Time-dependent infectivity and flexible  
639 latent and infectious periods in compartmental models of plant disease. *Phytopathology* **102**: 365–380.
- 640 **Delière L, Cartolaro P, Léger B, Naud O. 2015.** Field evaluation of an expertise-based formal decision  
641 system for fungicide management of grapevine downy and powdery mildews. *Pest Management Science*  
642 **71**: 1247–1257.

- 643 **Deliere L, Miclot AS, Sauris P, Rey P, Calon nec A. 2010.** Efficacy of fungicides with various modes of  
644 action in controlling the early stages of an Erysiphe necator-induced epidemic. *Pest Management*  
645 *Science* **66**: 1367–1373.
- 646 **Delp CJ. 1980.** Coping with resistance to plant disease control agents. *Plant Disease* **64**: 652–657.
- 647 **Doster MA, Milgroom MG, Fry WE. 1990.** Quantification of factors influencing potato late blight  
648 suppression and selection for metalaxyl resistance in *Phytophthora infestans*: a simulation approach.  
649 *Phytopathology* **80**: 1190–98.
- 650 **Dovas C, Skylakakis G, Georgopoulos SG. 1976.** The adaptability of the benomyl-resistant population  
651 of *Cercospora beticola* in Northern Greece. *Phytopathology* **66**: 1452–56.
- 652 **Gadoury DM, Seem RC, Ficke A, Wilcox WF. 2003.** Ontogenic resistance to powdery mildew in grape  
653 berries. *Phytopathology* **93**: 547–555.
- 654 **Gent DH, Mahaffee WF, McRoberts N, Pfender WF. 2013.** The use and role of predictive systems in  
655 disease management. *Annual Review of Phytopathology* **51**: 267–289.
- 656 **Gooding M, Dimmock J. 2000.** Green leaf area decline of wheat flag leaves: the influence of fungicides  
657 and relationships with mean grain weight and grain yield. *Annals of Applied Biology* **136**: 77–84.
- 658 **Gubbins S, Gilligan CA. 1999.** Invasion thresholds for fungicide resistance: deterministic and stochastic  
659 analyses. *Proceedings of the Royal Society B: Biological Sciences* **266**: 2539–2549.
- 660 **Hall RJ, Gubbins S, Gilligan CA. 2004.** Invasion of drug and pesticide resistance is determined by a  
661 trade-off between biocide efficacy and relative fitness. *Bulletin of Mathematical Biology* **66**: 835–840.
- 662 **Hobbelen PHF, Paveley ND, Bosch F Van Den. 2014.** The emergence of resistance to fungicides. *PLoS*  
663 *ONE* **9**: 1–14.
- 664 **Hobbelen PHF, Paveley ND, van den Bosch F. 2011a.** Delaying selection for fungicide insensitivity by  
665 mixing fungicides at a low and high risk of resistance development: a modeling analysis. *Phytopathology*  
666 **101**: 1224–33.
- 667 **Hobbelen PHF, Paveley ND, Fraaije BA, Lucas JA, van den Bosch F. 2011b.** Derivation and testing of  
668 a model to predict selection for fungicide resistance. *Plant Pathology* **60**: 304–313.
- 669 **Hobbelen PHF, Paveley ND, Oliver RP, van den Bosch F. 2013.** The usefulness of fungicide mixtures  
670 and alternation for delaying the selection for resistance in populations of *Mycosphaerella graminicola* on  
671 winter wheat: a modeling analysis. *Phytopathology* **103**: 690–707.
- 672 **Jørgensen LN, Bosch F Van Den, Oliver RP, Heick TM, Paveley N. 2017.** Targeting fungicide inputs  
673 according to need. *Annual Review of Phytopathology* **55**: 1–23.
- 674 **Josepovits G. 1989.** A model for evaluating factors affecting the development of insensitivity to  
675 fungicides. *Crop Protection* **8**: 106–113.
- 676 **Josepovits G, Dobrovolszky A. 1985.** A novel mathematical approach to the prevention of fungicide  
677 resistance. *Pest Management Science* **16**: 17–22.
- 678 **Kable P, Jeffery H. 1980.** Selection for tolerance in organisms exposed to sprays of biocide mixtures: a  
679 theoretical model. *Phytopathology* **70**: 8–12.
- 680 **Kitchen JL, Van Den Bosch F, Paveley ND, Helps J, Van Den Berg F. 2016.** The evolution of fungicide  
681 resistance resulting from combinations of foliar-acting systemic seed treatments and foliar-applied  
682 fungicides: A modeling analysis. *PLoS ONE* **11**: 1–21.
- 683 **Lamondia J. 2001.** Management of *Euonymus* anthracnose and fungicide resistance in *Colletotrichum*  
684 *gloeosporioides* by alternating or mixing fungicides. *Journal of Environmental Horticulture* **19**: 51–55.
- 685 **Madden L V. 2006.** Botanical epidemiology: some key advances and its continuing role in disease  
686 management. *European Journal of Plant Pathology* **115**: 3–23.



- 687 **Mammeri Y, Burie JB, Langlais M, Calonnec a. 2014.** How changes in the dynamic of crop  
688 susceptibility and cultural practices can be used to better control the spread of a fungal pathogen at the  
689 plot scale? *Ecological Modelling* **290**: 178–191.
- 690 **Mikaberidze A, Mcdonald BA, Bonhoeffer S. 2014.** Can high-risk fungicides be used in mixtures  
691 without selecting for fungicide resistance? *Phytopathology* **104**: 324–331.
- 692 **Mikaberidze A, Paveley N, Bonhoeffer S, van den Bosch F. 2017.** Emergence of resistance to  
693 fungicides: the role of fungicide dose. *Phytopathology* **107**: 545–560.
- 694 **Milgroom M, Fry W. 1988.** A simulation analysis of the epidemiological principles for fungicide resistance  
695 management in pathogen populations. *Phytopathology* **78**: 565–570.
- 696 **Parnell S, van den Bosch F, Gilligan CA. 2006.** Large-scale fungicide spray heterogeneity and the  
697 regional spread of resistant pathogen strains. *Phytopathology* **96**: 549–555.
- 698 **Parnell S, Gilligan CA, van den Bosch F. 2005.** Small-scale fungicide spray heterogeneity and the  
699 coexistence of resistant and sensitive pathogen strains. *Phytopathology* **95**: 632–639.
- 700 **Paveley N, Blake J, Gladders P, Cockerell V. 2014.** *The wheat disease management guide*. United  
701 Kingdom: Home-Grown Cereals Authority.
- 702 **Pool RM, Pearson RC, Welser MJ, Lakso AN, Seem RC. 1984.** Influence of powdery mildew on yield  
703 and growth of Rosette grapevines. *Plant Disease* **68**: 590–593.
- 704 **Reuveni M. 2001.** Activity of trifloxystrobin against powdery and downy mildew diseases of grapevines.  
705 *Canadian Journal of Plant Pathology* **23**: 52–59.
- 706 **Russell PE. 2005.** A century of fungicide evolution. *The Journal of Agricultural Science* **143**: 11–25.
- 707 **Sanders PL, Houser WL, Parish PJ, Cole H. 1985.** Reduced-rate fungicide mixtures to delay fungicide  
708 resistance and to control selected turfgrass disease. *Plant Disease* **69**: 939–43.
- 709 **Savary S, Delbac L, Rochas A, Taisant G, Willocquet L. 2009.** Analysis of nonlinear relationships in  
710 dual epidemics, and its application to the management of grapevine downy and powdery mildews.  
711 *Phytopathology* **99**: 930–42.
- 712 **Shaw M. 1989a.** Independent action of fungicides and its consequences for strategies to retard the  
713 evolution of fungicide resistance. *Crop Protection* **8**: 405–411.
- 714 **Shaw M. 1989b.** A model of the evolution of polygenically controlled fungicide resistance. *Plant*  
715 *Pathology* **38**: 44–55.
- 716 **Shaw MW. 2000.** Models of the effects of dose heterogeneity and escape on selection pressure for  
717 pesticide resistance. **90**: 333–339.
- 718 **Shaw MW. 2006.** Is there such a thing as a fungicide resistance strategy? A modeller's perspective.  
719 *Aspects of Applied Biology* **78**: 95–103.
- 720 **Skylakakis G. 1981.** Effects of alternating and mixing pesticides on the buildup of fungal resistance.  
721 *Phytopathology* **71**: 1119–1121.
- 722 **Staub T, Sozzi D. 1983.** Recent practical experiences with fungicide resistance. *Proceedings 10th*  
723 *International Congress of Plant Protection*: 591–98.
- 724 **Vali RJ, Moorman GW. 1992.** Influence of selected fungicide regimes on frequency of dicarboximide-  
725 resistant and dicarboximide-sensitive strains of *Botrytis cinerea*. *Plant Disease* **76**: 919–24.
- 726 **Waggoner P, Berger R. 1987.** Defoliation, disease, and growth. *Phytopathology* **77**: 393–398.
- 727

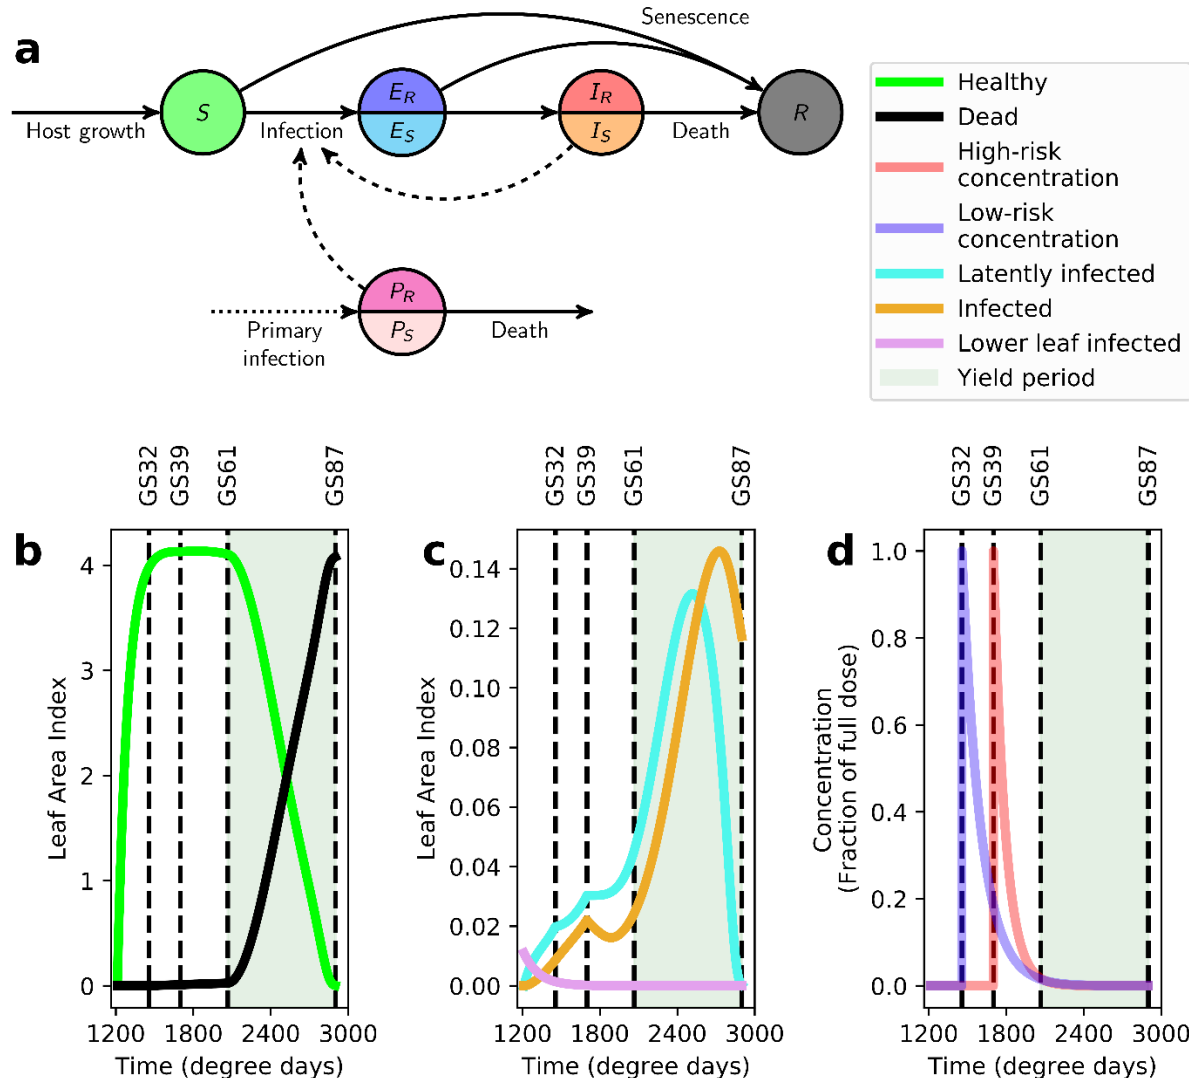

728

729 **Figure 1. Model of septoria on winter wheat.** (a) A schematic showing the structure of the within-season  
 730 model for septoria on winter wheat (see also Methods S1 for the differential equations specifying the model).  
 731 The model distinguishes healthy, uninfected leaf tissue (Susceptible) from different classes of infectious  
 732 tissue: latently-infected (Exposed), sporulating (Infectious) and dead (Removed), as well as tracking the  
 733 density of inoculum on lower leaves (Primary). Circles represent these epidemiological compartments (split  
 734 into two where necessary to account for fungicide-sensitive and fungicide-resistant pathogen strains), solid  
 735 lines represent transitions between compartments, dashed lines represent effects on the rates of transitions  
 736 and the dotted arrow represents the point of initial infection in each growing season. Panels (b)-(d) show  
 737 the dynamics of the model in the first growing season using the default model parametrisation (Table S1)  
 738 and the alternation low-high strategy at full doses of both chemicals. This corresponds to a full dose of the  
 739 low-risk fungicide at GS32 (1456 degree days after planting), and a full dose of the high-risk fungicide at  
 740 GS39 (1700 degree days after planting). The critical time for the accumulation of yield (GS61 to GS87;  
 741 2066 to 2900 degree days after planting) is shaded; control is considered to have broken down if yields  
 742 <95% of the disease-free yield are obtained. (b) The leaf area index of healthy and dead tissue over time.  
 743 (c) The amount of primary inoculum and leaf area index of infected tissue over time. (d) The concentration  
 744 of both fungicides over time. Note that in panels (b)-(d) dynamics start 1212 degree days after the start of  
 745 the growing season; this corresponds to the time of emergence of leaf 5, with all pathogen dynamics before  
 746 that time subsumed in the initial condition for the primary inoculum.

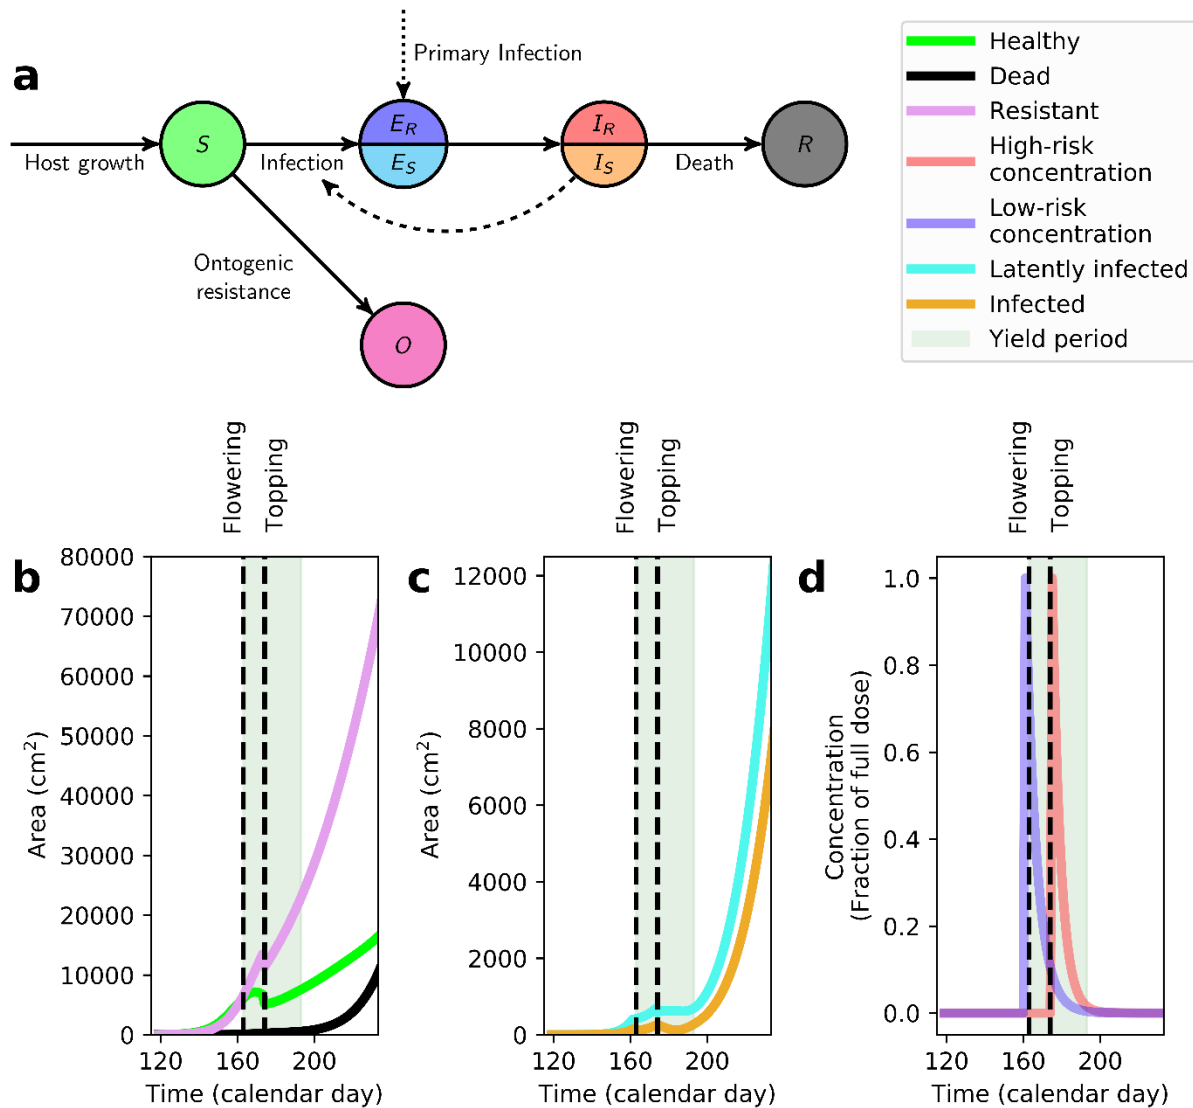

747

748 **Figure 2. Model of powdery mildew on grapevine.** (a) A schematic showing the structure of the within-  
 749 season model for powdery mildew on grapevine (see also Methods S3 for the differential equations  
 750 specifying the model). The model distinguishes healthy, uninfected leaf tissue (Susceptible) from different  
 751 classes of infectious tissue: latently-infected (Exposed), sporulating (Infectious) and dead (Removed), as  
 752 well as (Ontogenic) tissue which has become resistant to infection by virtue of its age. Again, circles  
 753 represent epidemiological compartments (split into two where necessary for each pathogen strain), solid lines  
 754 represent transitions between compartments, dashed lines represent effects on the rates of transitions  
 755 and the dotted arrow represents the point of initial infection in each growing season. Panels (b)-(d) show  
 756 the dynamics of the model when a full dose of the low-risk is applied at the first spray (at day 161, 2 days  
 757 before flowering occurs at day 163) and of the high-risk at the second spray (day 175, 12 days after  
 758 flowering). Control is considered to have broken down when the severity of disease exceeds 3% within the  
 759 period from flowering to 30 days later. (b) The area of healthy and dead tissue over time. (c) Area of infected  
 760 tissue over time. (d) Concentration of fungicide over time. Note the agronomic practice of topping is  
 761 modelled as being performed 10 days after flowering (day 173), and this leads to sharp changes in the  
 762 values of state variables and epidemiological parameters at this time (Methods S3).

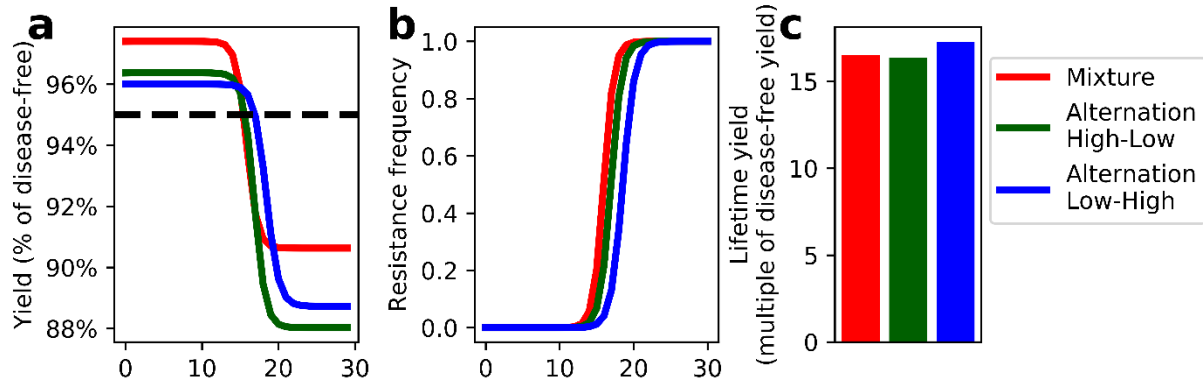

763

764 **Figure 3. Performance at full doses of both fungicides.** (a) The yield – expressed as a percentage of  
765 the disease-free yield – as a function of the growing season, for all three strategies at full doses. The dashed  
766 line corresponds to the critical yield threshold (95% of the disease-free yield) below which control is  
767 assumed to be economically ineffective. (b) The frequency of resistance to the high-risk fungicide in the  
768 pathogen population at the start of each growing season. (c) The overall lifetime yield (expressed as a  
769 multiple of the disease-free yield in a single season).

770

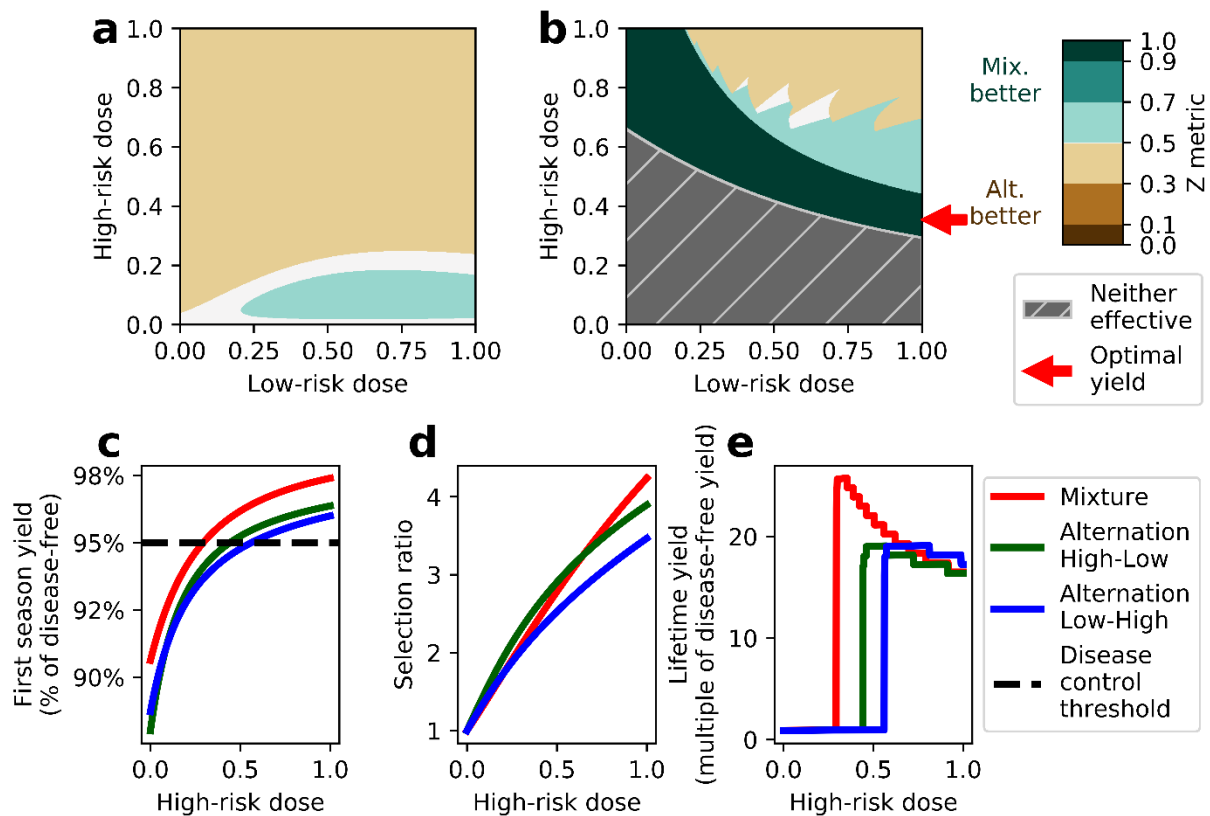

771

772 **Figure 4. Defining the optimal spray strategy and dose combination.** (a) Comparison of the selection  
 773 ratio ( $SR$ ) for mixtures vs. alternation, for different doses of high-risk and low-risk fungicides (over the entire  
 774 growing season, and so under mixtures each dose as shown in dose-space is halved at the time of  
 775 application; this is done for all results presented in this paper). In all cases the selection ratio under mixtures  
 776 is compared with the best-performing of the two alternation strategies. The Z metric – which is used to  
 777 visualise the comparison – is defined here as  $SR_{ALT} / (SR_{ALT} + SR_{MIX})$ . Values lower than 0.5 therefore  
 778 indicate alternation is superior, and values greater than 0.5 indicate mixtures are superior. Values very  
 779 close to 0.5 – which are shaded white – correspond to the two strategies performing equally well. (b)  
 780 Comparison of the lifetime yield ( $LY$ ) for mixtures vs. the best performing alternation strategy. The Z metric  
 781 is defined here as  $LY_{MIX} / (LY_{ALT} + LY_{MIX})$ : again higher values indicate mixtures are superior. Regions of  
 782 dose-space within which no spray strategy can provide effective control in the first growing season are  
 783 hatch-shaded grey; the dark green region corresponds to areas of dose-space within which disease can  
 784 only be controlled when the fungicides are sprayed as a mixture. The largest lifetime yield is marked with  
 785 the red arrow, and occurs when spraying using a mixture including the maximum dose of low-risk fungicide  
 786 ( $C_L = 1.0$ ). Panels (c)-(e) show results for all three strategies as a function of high-risk dose when the low-  
 787 risk dose is fixed at  $C_L = 1.0$ . Individual panels: (c) first-season yield; (d) selection ratio; and (e) lifetime  
 788 yield. In (c) the dashed line shows the disease control threshold.

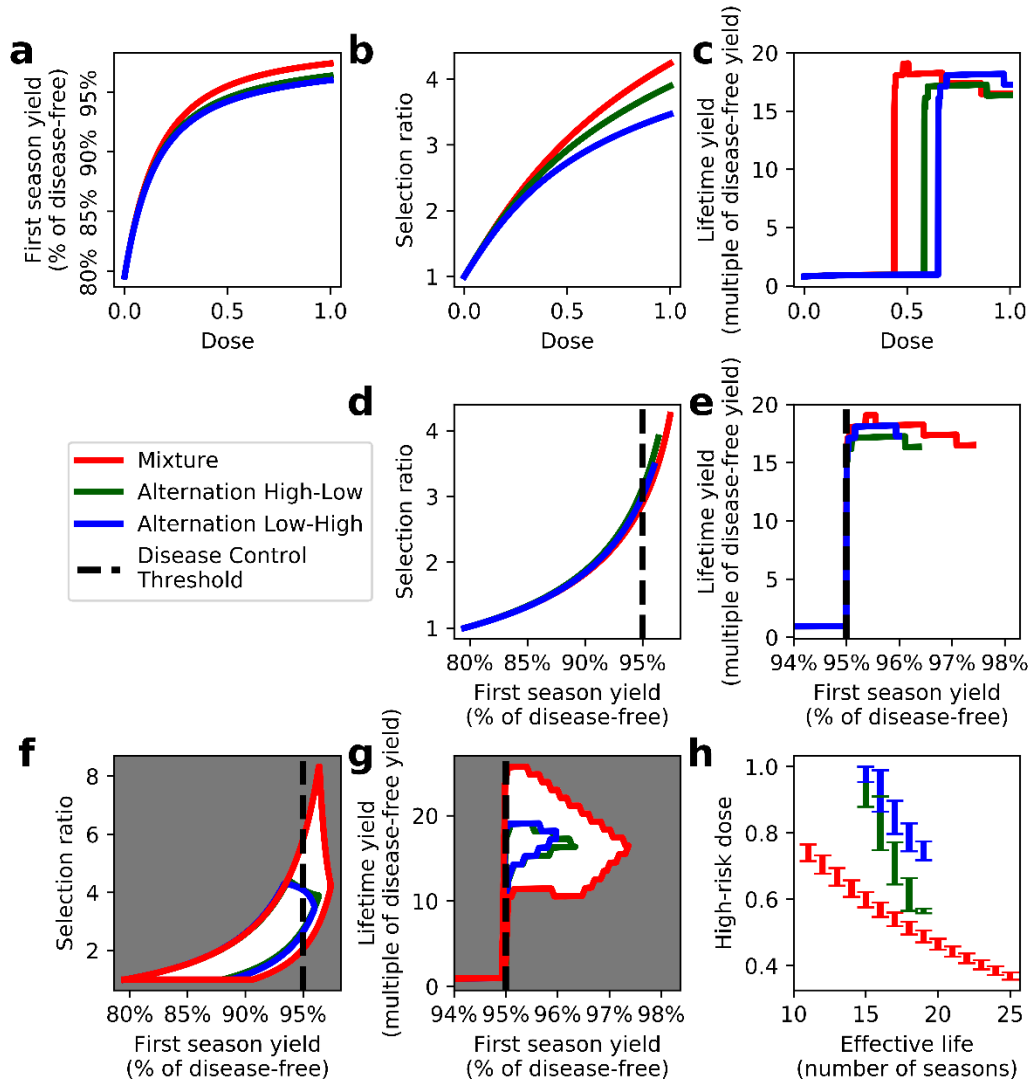

789

**Figure 5. Balancing selection and disease control.** Panels (a)-(c) show performance as the dose varies but when equal amounts of low- and high-risk fungicide are sprayed (i.e.  $C_L = C_H$ ). Individual panels are: (a) first-season yield; (b) selection ratio; and (c) lifetime yield. Panels (d) (selection ratio) and (e) (lifetime yield) show the results from (b) and (c) plotted as a function of the first season yield. When normalised for the level of initial disease control, mixtures lead to less selection and larger lifetime yields than either alternation strategy. Panels (f)-(h) show the results when the constraint that doses of both fungicides should be equal is removed. For all three strategies there are ranges of values of the selection ratio and the lifetime yield that correspond to each single value of the first season yield, with different relative proportions of high-risk to low-risk fungicide that is sprayed. The top and bottom of the ranges of the selection ratio and the lifetime yield are shown for each strategy, although all intermediate points can be attained for different combinations of low- and high-risk chemicals. The ranges are wider for mixtures than for either alternation strategy, meaning that – depending on the dose of high-risk fungicide – mixtures can lead to both better and worse outcomes for resistance management at any level of disease control. However, dose combinations that cause mixtures to provide the most effective resistance management can always be selected. (h) The range of high-risk doses that lead to different effective lifetimes, for each strategy (first season yields between 95.45% and 95.55%; this corresponds to vertical slice through the data shown in panel (g)). A wider range of effective lifetimes are possible at this level of disease control under mixtures, and a given effective lifetime results from a smaller dose of high-risk fungicide. In (a), (d), (e), (f) and (g) the dashed line shows the disease control threshold.

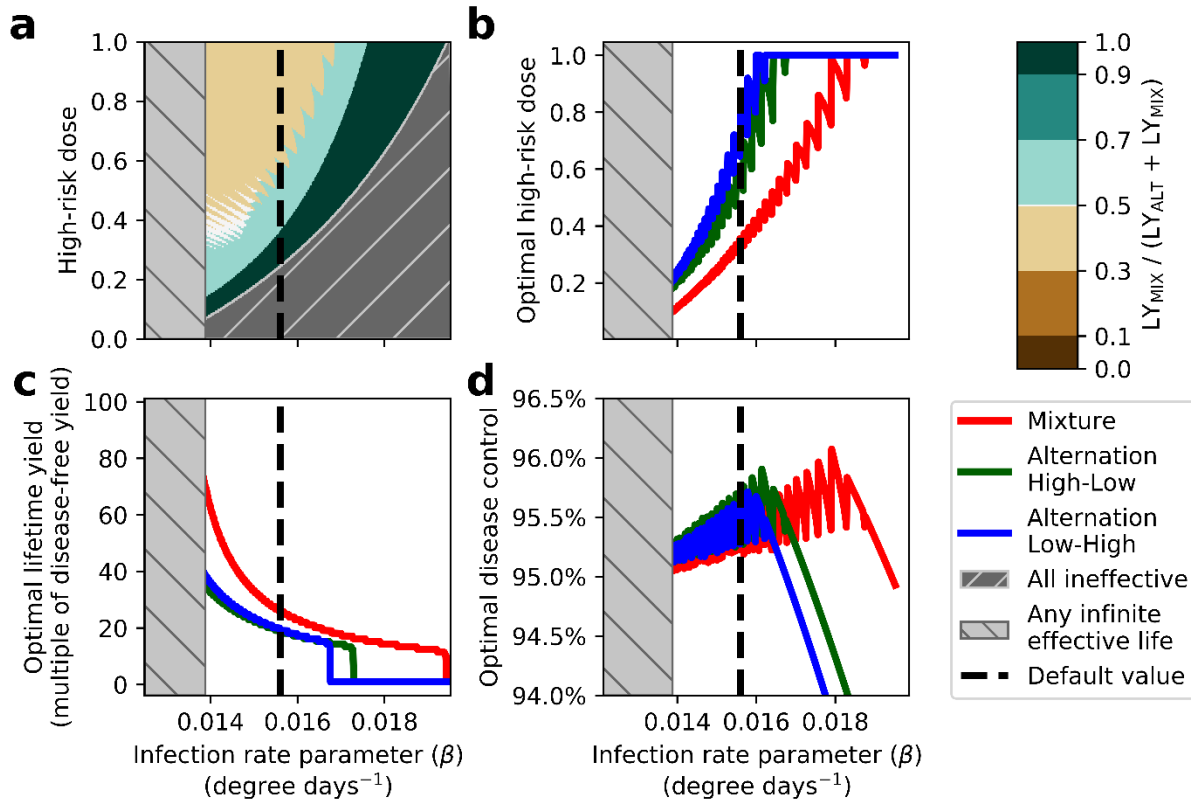

809

810 **Figure 6. Response to the infection rate parameter.** (a) The value of the Z metric for lifetime yield (i.e.  $Z$   
811  $= LY_{MIX} / (LY_{ALT} + LY_{MIX})$ ) for different values of the infection rate  $\beta$  (x-axis) and doses of high-risk chemical,  
812  $C_H$  (y-axis), when the dose of the low-risk chemical is fixed at  $C_L = 1.0$ . The dark grey region corresponds  
813 to pairs of infection rates and high-risk doses for which no strategy can provide effective control in the first  
814 growing season, and the light grey region corresponds to at least one of the strategies providing effective  
815 control without any high-risk chemical being sprayed (and so within which resistance management is trivial).  
816 (b) The optimal dose of high-risk chemical for each strategy as a function of the infection rate. (c) The  
817 corresponding lifetime yield that is obtained. (d) The level of disease control – as measured by the yield in  
818 the first season – at optimum for each strategy. In panels (b) and (d) the saw-tooth pattern is because the  
819 effective lifetime – the most important determinant of the lifetime yield – is a discrete quantity. The dashed  
820 lines in all panels shows the default value of  $\beta$ .

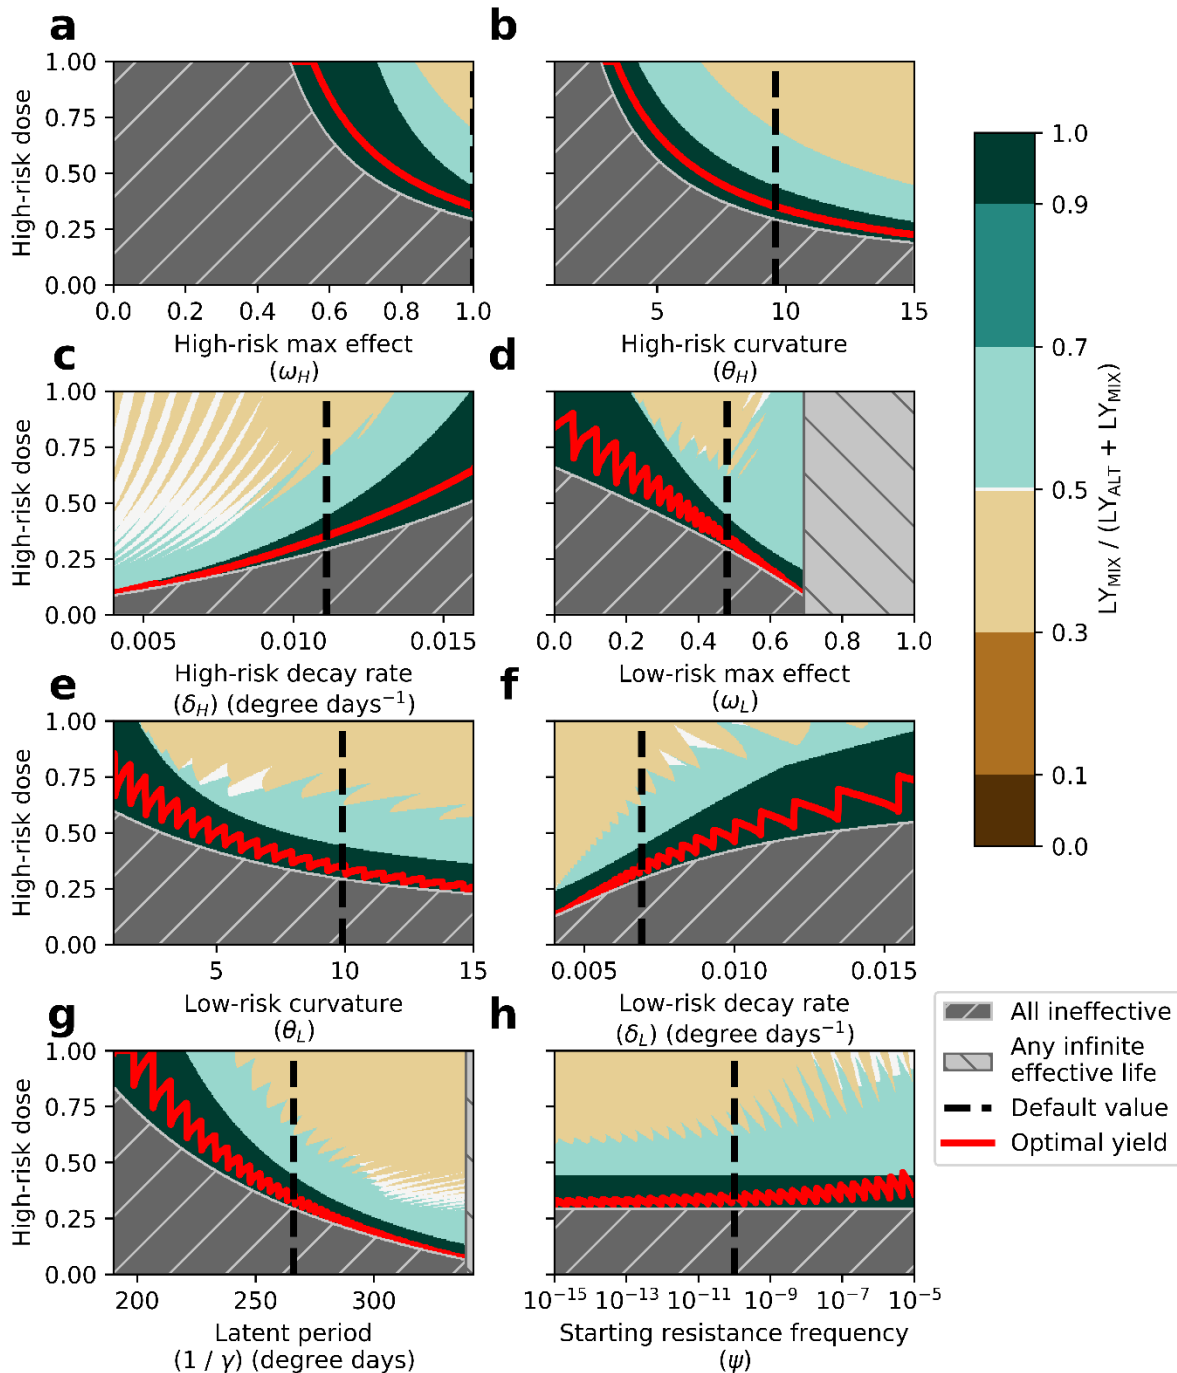

821

822 **Figure 7. Full sensitivity analysis for a range of epidemiological and fungicide parameters.** Each  
 823 panel shows the equivalent of Figure 6(a) for a different parameter. (a) Maximum effect parameter for the  
 824 high-risk fungicide. (b) Curvature parameter for the high-risk fungicide. (c) Decay rate for the high-risk  
 825 fungicide. (d) Maximum effect parameter for the low-risk fungicide. (e) Curvature parameter for the low-risk  
 826 fungicide. (f) Decay rate for the low-risk fungicide. (g) Pathogen latent period. (h) Initial frequency of the  
 827 resistant pathogen strain. The red lines mark the optimal doses of high-risk fungicide for lifetime yield for  
 828 each value of the parameters: in all cases this corresponds to applying the two fungicides as a mixture.



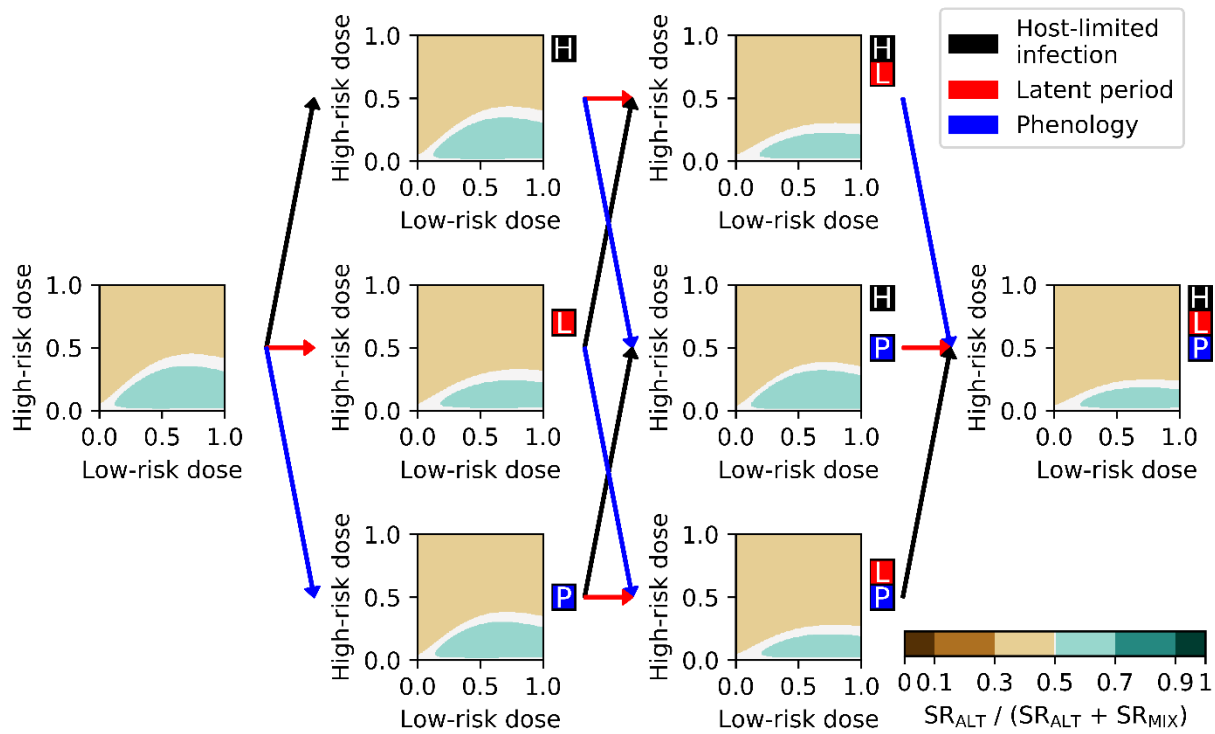

829

830 **Figure 8. Effect of model structure on the comparison between mixtures and alternation for**  
 831 **selection.** The relative performance of mixtures and (the best-performing) alternation is plotted in dose-  
 832 space, by calculating the Z metric,  $Z = SR_{ALT} / (SR_{ALT} + SR_{MIX})$ , for all of the powdery mildew sub-models  
 833 investigated. The coloured boxes next to each subplot identify what model features are present, and the  
 834 coloured lines show which features differ between connected sub-models. The right-most model includes  
 835 all features, and so corresponds to the full model of septoria considered in the bulk of the paper (i.e. the  
 836 right-most plot is exactly as Figure 4a).

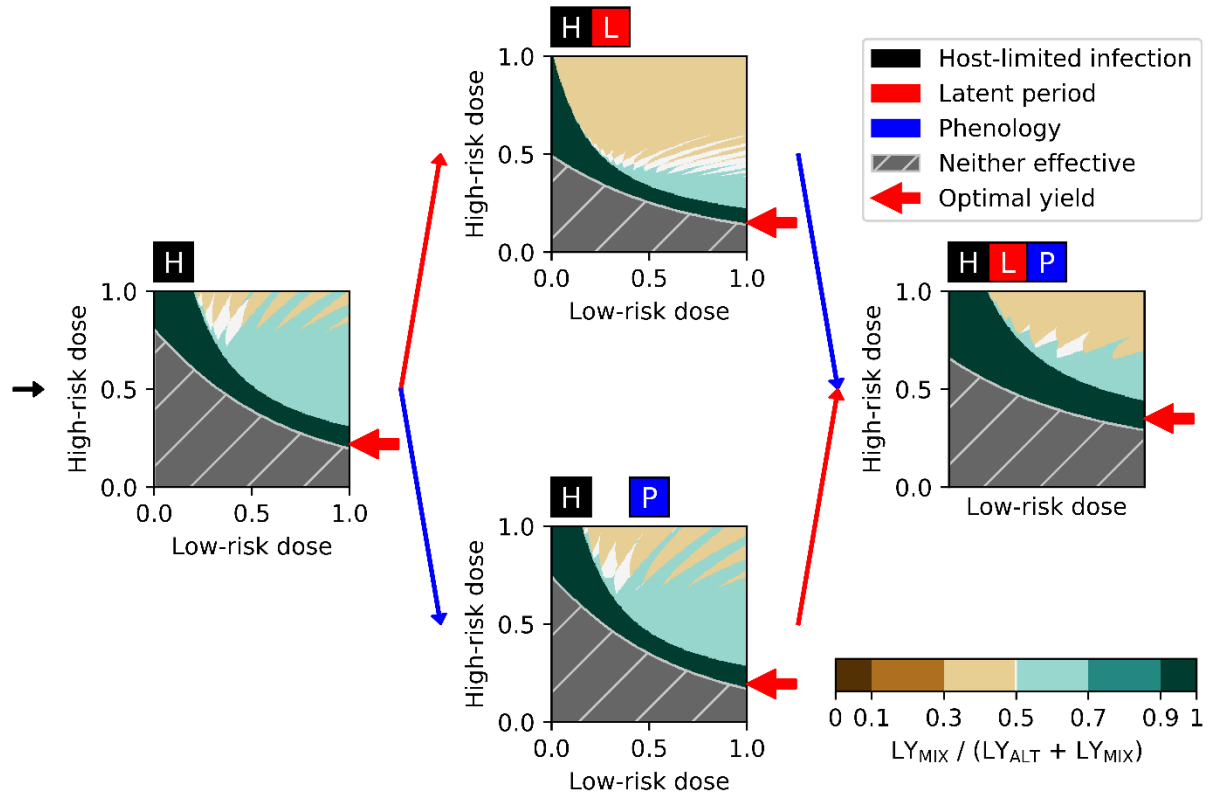

837

838 **Figure 9. Effect of model structure on the comparison between mixtures and alternation for lifetime**  
 839 **yield.** The relative performance for lifetime yield of mixture and (the best-performing) alternation is plotted  
 840 in dose-space, showing  $Z = LY_{MIX} / (LY_{ALT} + LY_{MIX})$ , for a range of the powdery mildew sub-models  
 841 investigated. Note that it does not make sense to consider the yield in models which do not contain host  
 842 limitation, and so these models are omitted. The optimal lifetime yield is marked by the red arrow (in all  
 843 cases this is at full-dose of low-risk and is obtained under mixture). Note again that the right-most model  
 844 corresponds to the full model, and so replicates Figure 4b.

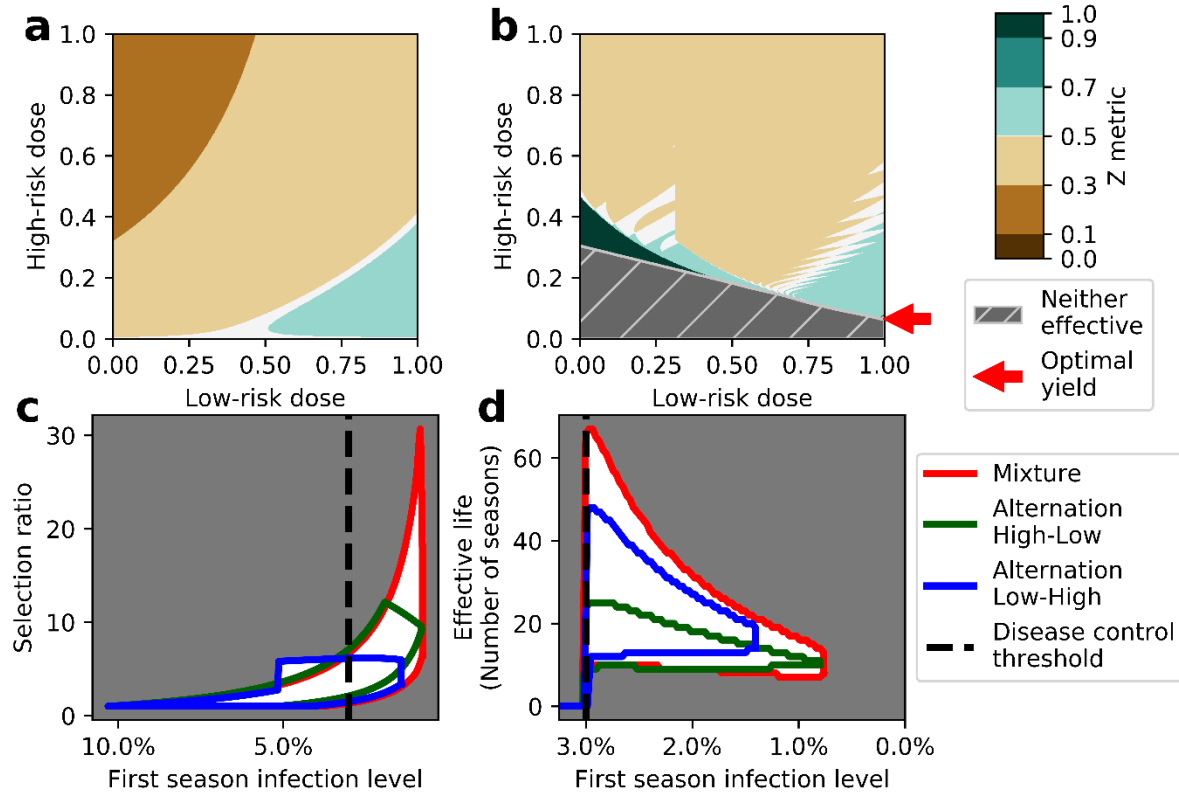

845

846 **Figure 10. Effect of pathosystem: results for grapevine powdery mildew.** (a) Comparison of the  
847 selection ratio for mixtures vs. the best-performing alternation strategy for the model of powdery mildew on  
848 grapevine, for different doses of high-risk and low-risk fungicide (*cf.* Figure 4a, which shows the  
849 corresponding result for septoria on winter wheat). (b) Corresponding comparison of lifetime yield in dose-  
850 space (*cf.* Figure 4b). (c) Range of selection ratios as a function of the first season infection level for the  
851 grapevine model (*cf.* Figure 5f). (d) Range of lifetime yields as a function of the first season infection level  
852 for the grapevine model (*cf.* Figure 5g). Again (*cf.* Figure 5f and g), ranges are almost always wider for  
853 mixtures than for either alternation strategy, meaning that – depending on the dose of high-risk fungicide –  
854 mixtures can lead to both better and worse outcomes for resistance management at any level of disease  
855 control. However, dose combinations that cause mixtures to provide the most effective resistance  
856 management can always be selected. The dashed lines in (c) and (d) show the minimal acceptable level of  
857 disease control.

858

859

## SUPPORTING INFORMATION

860  
861

### Methods S1 Model of septoria leaf blotch on winter wheat

862

863  
864 As described in the main text, the model of septoria leaf blotch on winter wheat is a semi-  
865 discrete, compartmental model that runs over successive growing seasons. The model  
866 was derived, parameterised and tested against field data in Hobbelen *et al.* (2011).

867

868 The model tracks the leaf area index (LAI), the area of leaf per area of ground, of different  
869 classes of leaf tissue, distinguishing a number of epidemiologically-relevant  
870 compartments: the area of healthy uninfected tissue (**S**usceptible), the area of latent  
871 (**E**xposed) and infectious (**I**nfectious) lesions, and the area of dead tissue (**R**emoved). All  
872 classes involving the pathogen are divided into separate sub-compartments for the  
873 fungicide-resistant (subscript R) and fungicide-sensitive (subscript S) strains. Note that  
874 the fungicide-resistant and fungicide-sensitive strain dynamics are identical except that  
875 the high-risk fungicide does not affect the fungicide-resistant strain.

876

877 We denote the total upper leaf LAI as  $A$ , with

$$878 \quad A = S + E_R + E_S + I_R + I_S + R. \quad 7$$

879

880 This LAI grows at rate  $g$ , which is monomolecular after the emergence of the first leaf  
881 tracked, and in which disease has no effect on growth

$$882 \quad g(A, t) = \begin{cases} 0, & t < T_{EMERGE} \\ r(k - A), & t \geq T_{EMERGE} \end{cases}. \quad 8$$

883

884

885 Living host tissues senesce at a rate  $\Gamma$  governed by the time in the season relative to key  
886 growth stages,

$$887 \quad \Gamma(t) = \begin{cases} 0, & t < T_{GS61} \\ 0.005 \left( \frac{t - T_{GS61}}{T_{GS87} - T_{GS61}} \right) + 0.1e^{-0.02(T_{GS87} - t)}, & t \geq T_{GS61} \end{cases}. \quad 9$$

888

889 The system of differential equations describing the system is then

$$\begin{aligned}\frac{dS}{dt} &= g(A,t) - \Gamma(t)S - \frac{\beta S}{A}(1 - \epsilon(C_L))((1 - \epsilon(C_H))(I_S + P_S) + I_R + P_R) \\ \frac{dE_R}{dt} &= \frac{\beta S}{A}(1 - \epsilon(C_L))(I_R + P_R) - \Gamma(t)E_R - \gamma E_R \\ \frac{dE_S}{dt} &= \frac{\beta S}{A}(1 - \epsilon(C_L))(1 - \epsilon(C_H))(I_S + P_S) - \Gamma(t)E_S - \gamma(1 - \epsilon(C_H))E_S \\ \frac{dI_R}{dt} &= \gamma E_R - \mu I_R \\ \frac{dI_S}{dt} &= \gamma(1 - \epsilon(C_H))E_S - \mu I_S \\ \frac{dR}{dt} &= \mu(I_R + I_S) + \Gamma(S + E_R + E_S) \\ \frac{dP_R}{dt} &= -vP_R \\ \frac{dP_S}{dt} &= -vP_S \\ \frac{dC_H}{dt} &= -\delta_H C_H \\ \frac{dC_L}{dt} &= -\delta_L C_L\end{aligned}$$

890

10

891

892 The model was slightly updated relative to the original publication (Hobbelen *et al.* 2011)  
893 by modelling disease spread on the top 5 rather than the top 3 leaves. This avoided an  
894 edge effect whereby the spray at GS32 (very near to the start of the growing season as  
895 modelled in the Hobbelen paper) exerted an unrealistically large amount of selection. This  
896 was a modelling artefact due to extremely large per-capita growth rates at the start of the  
897 modelled season (caused by primary infection from the time-decaying inoculum), which  
898 was fixed by shifting the effective start of the growing season back by two phyllochrons.  
899 This change additionally facilitates comparison with later models which track these  
900 additional leaves (van den Berg *et al.* 2013). This required the infection rate ( $\beta$ ) be re-  
901 fitted, which was done by minimising the squared difference between areas of infectious  
902 tissue, summed over every degree-day, between the Hobbelen *et al.* (2013) model and  
903 the new parameterisation starting at the emergence of leaf 5. The optimisation was  
904 carried out for the times from the emergence of leaf 3 onwards and with no fungicide  
905 applied.

906 **Methods S2 Sensitivity analysis to model structure for the model of septoria leaf**  
907 **blotch**

908  
909 As described in the main text, we investigate the effect of three main features of the  
910 septoria model: host-limited infection, whether the latent period is modelled, and  
911 phenology. Each of these features corresponds to certain features being included/omitted  
912 from the model

913  
914 • **Host-limited infection.** In models which do not include host-limited infection, the  
915 infection rate is independent of the amount of host tissue, and so the terms for  
916 infection in Equation 10 are altered as follows

917 Resistant:  $\frac{\beta S}{A}(1-\epsilon(C_L))(I_R + P_R) \rightarrow \beta(1-\epsilon(C_L))(I_R + P_R)$

Sensitive:  $\frac{\beta S}{A}(1-\epsilon(C_L))(1-\epsilon(C_H))(I_S + P_S) \rightarrow \beta(1-\epsilon(C_L))(1-\epsilon(C_H))(I_S + P_S)$

- 918 • **Latent period.** If the latent period is removed, infection moves tissue directly  
919 from the S class to  $I_R$  and  $I_S$  without passing through  $E_R$  and  $E_S$ .
- 920 • **Phenology.** If phenology is removed from the model, the senescence term  $\Gamma(t)$   
921 (Equation 9) is set to zero and the state variables corresponding to primary  
922 inoculum ( $P_R$  and  $P_S$ ) are removed from the model. The epidemic is then started  
923 each season by adding a small amount of  $E_R$  and  $E_S$  (or  $I_R$  and  $I_S$  if there is also  
924 no latent period in the simplified model). The amount added is the same as the  
925 amount of primary inoculum that would have been present if phenology were  
926 included in the model.

927  
928 Every possible model which either includes or excludes each of these three factors is  
929 considered, leading to a total of eight different models. Since models without host-limited  
930 infection cannot provide information about the loss of green tissue to infection, they are  
931 excluded for the yield analysis, leaving 4 models in that case.

932  
933 The infection rate parameter ( $\beta$ ) is refitted for each model, to allow results to be directly  
934 compared. The fitting was done by generating data for every degree-day from the full  
935 model when spraying under each of the spraying strategies (mixture and the two  
936 alternations) at four different doses of each fungicide (0.25, 0.5, 0.75 and full dose) and  
937 when there is no fungicide-resistant pathogen. The value of the infection rate parameter  
938 for each simplified model was chosen that minimised the sum of squared differences  
939 between the curves for the amount of  $I_S$  over a single season for the full model and the  
940 given simplified model. Multiple doses and strategies were used in the fitting in order to  
941 give a parameter value that gave overall similar dynamics across the range of doses that  
942 were compared. The results of this fitting are given in Figure S1.

### 943 **Methods S3 Model of powdery mildew on grapevine**

944 Similarly to the model of winter wheat septoria leaf blotch, the model of powdery mildew  
945 on grapevine is a semi-discrete, compartmental model and runs over multiple growing  
946 seasons. The model was derived and parameterised in Burie *et al.* (2011).

947  
948 The model tracks: healthy uninfected tissue (**S**usceptible), the area of latent (**E**xposed)  
949 and infectious (**I**nfectious) lesions, leaf area that has developed resistance to disease due  
950 to age (**O**ntogenic) and dead tissue (**R**emoved). All classes involving the pathogen are  
951 divided into a sub-compartment for the fungicide-resistant (subscript R) and fungicide-  
952 sensitive (subscript S) strains. Again the fungicide-resistant and fungicide-sensitive strain  
953 dynamics are almost identical except that the high-risk fungicide does not affect the  
954 fungicide-resistant strain.

955  
956 The total leaf area is

$$957 \quad A = S + E_R + E_S + I_R + I_S + R + O, \quad 11$$

958 and this is assumed to grow logistically, with

$$959 \quad g(A, t) = r(t)A \left( 1 - \frac{A}{k(t)} \right). \quad 12$$

960  
961 The growth parameters  $r(t)$  and  $k(t)$  are piecewise constant functions depending on  
962 whether  $t$  is before or after shoot topping, which is the agronomic practice of removing  
963 the upper shoots to encourage secondary growth (see also Table S2). Shoot topping is  
964 modelled as occurring on day 173 of the season, and changes the value of these host  
965 growth parameters, as well as the infection rate parameter. It also leads to a 20%  
966 reduction in the size of the state variable for each compartment.

967  
968 The system of ODEs describing the powdery mildew model is

$$\begin{aligned}\frac{dS}{dt} &= g(A,t) - \frac{\beta(t)S}{A}(1 - \epsilon(C_L))((1 - \epsilon(C_H))I_S + I_R) - mS \\ \frac{dE_R}{dt} &= \frac{\beta(t)S}{A}(1 - \epsilon(C_L))I_R - \gamma(1 - \epsilon(C_L))E_R \\ \frac{dE_S}{dt} &= \frac{\beta(t)S}{A}(1 - \epsilon(C_L))(1 - \epsilon(C_H))I_S - \gamma(1 - \epsilon(C_L))(1 - \epsilon(C_H))E_S \\ \frac{dI_R}{dt} &= \gamma(1 - \epsilon(C_L))E_R - \mu I_R \\ \frac{dI_S}{dt} &= \gamma(1 - \epsilon(C_L))(1 - \epsilon(C_H))E_S - \mu I_S \\ \frac{dR}{dt} &= \mu(I_R + I_S) \\ \frac{dO}{dt} &= mS \\ \frac{dC_H}{dt} &= -\delta_H C_H \\ \frac{dC_L}{dt} &= -\delta_L C_L\end{aligned}$$

969

13

970

971 The values for the fungicide dose-response and decay parameters were matched to data  
972 from the literature. Jyot *et al.* (2010) measured half-lives of around 3 days for  
973 trifloxystrobin on grapevine, and Nasr (2010) found half-lives of around 4 days for sulphur  
974 on tomatoes and squashes. Little data was available was available on fungicide  
975 effectiveness and so the assumption was made that the maximum effectiveness of both  
976 fungicides was 1, representing the assumption that given a suitably high dose of either  
977 fungicide the growth of the pathogen can be almost entirely suppressed (even if only for  
978 a short time). Reuveni *et al.* (2001) provides the reduction in disease severity when 6  
979 sprays of sulphur or trifloxystrobin were used. The model was set up so that 6 sprays of  
980 fungicide were applied starting at day 120, with 14 days between sprays. The values for  
981 the curvatures of both fungicides that minimised the sum of squared differences between  
982 the percentage reduction in disease severity (compared to untreated) in the model and in  
983 the 1999 dataset from Reuveni *et al.* (2001) was then calculated, summing values from  
984 each individual day in the models' results.



## 985 **Methods S4 Analysis of selection in a very simple model of resistance dynamics**

986 We consider here an extremely simple model which allows the cumulative selection  
 987 coefficient – under both mixture and alternation – to be calculated analytically. We ignore  
 988 exponential decay of fungicides, and instead assume that fungicides remain at fixed dose  
 989 for a certain amount of time after spraying. There is no unique way to map the applied  
 990 doses when there is no decay to that case when fungicides decay that conserves the total  
 991 effect of the fungicides (i.e. integral with respect to time), since the mapping depends on  
 992 the timescale. Instead the dose applied when there is no decay is simply assumed to be  
 993 the same as with decay. This final simplification leads to a simple exponential model, of  
 994 a form very similar to those of the early fungicide resistance modelling literature (Kable  
 995 and Jeffery 1980; Skylakakis 1981)

$$996 \quad \frac{dl_R}{dt} = \beta(1 - \epsilon(C_L))l_R \quad . \quad 14$$

$$\frac{dl_S}{dt} = \beta(1 - \epsilon(C_L))(1 - \epsilon(C_H))l_S$$

997  
 998 Taking the selection coefficient to be the difference in per capita growth rates of the two  
 999 strains, and assuming that the fungicides are present for twice as long under mixture as  
 1000 under alternation leads to an analytical form for the cumulative selection coefficients  
 1001 under each strategy:

$$1002 \quad \sigma_{\text{MIXTURE}} = 2T\beta\epsilon\left(\frac{C_H}{2}\right)\left(1 - \epsilon\left(\frac{C_L}{2}\right)\right), \quad 15$$

$$\sigma_{\text{ALTERNATION}} = T\beta\epsilon(C_H)$$

1003 in which  $T$  is the time of exposure to fungicide under alternation, and where the additional  
 1004 factor of 2 for mixture is because fungicide is then sprayed twice as often.

1005  
 1006 The ratio of these two quantities quantifies whether mixture (ratio greater than 1) or  
 1007 alternation (ratio less than 1) provides better resistance management

$$1008 \quad \frac{\sigma_{\text{ALTERNATION}}}{\sigma_{\text{MIXTURE}}} = \frac{1 - e^{-\theta_H C_H}}{2\left(1 - \omega_L\left(1 - e^{-\frac{\theta_L C_L}{2}}\right)\right)}. \quad 16$$

1009 Note that the underlying infection rate ( $\beta$ ), the maximum effect of the high-risk fungicide  
 1010 ( $\omega_H$ ), and the time for which fungicide is present ( $T$ ) all cancel out of this expression.  
 1011 If we examine the case where this ratio is equal to 1, and ignore the solution  $C_H = 0$ , we  
 1012 can calculate the equation of the boundary curve between the area where mixture and  
 1013 alternation perform better

$$1014 \quad C_H^* = \frac{-2}{\theta_H} \ln\left(1 - 2\omega_L\left(1 - e^{-\frac{\theta_L C_L^*}{2}}\right)\right). \quad 17$$

1015 Taking the derivative with respect to the low-risk fungicide dose at equal performance

1016

$$\frac{dC_H^*}{dC_L^*} = \frac{2\omega_L\theta_L e^{-\frac{\theta_L C_L^*}{2}}}{\theta_H \left( 1 - 2\omega_L \left( 1 - e^{-\frac{\theta_L C_L^*}{2}} \right) \right)}. \quad 18$$

1017

1018 Given that all parameters are strictly positive then the sign of this equation is determined  
 1019 by the sign of the denominator which is positive if and only if  $\varepsilon(C_L^*/2) > \frac{1}{2}$ . However, if we  
 1020 look at the equation for the boundary curve,  $C_H^*$  is undefined if this condition is met, since  
 1021 Equation 17 is infinite for  $\varepsilon(C_L^*/2) = \frac{1}{2}$ . As the first derivative cannot be zero there are no  
 1022 turning points and the boundary function is monotonic. We can conclude that there are always  
 1023 areas where both strategies can out-perform the other (although they can be small)  
 1024 separated by a monotonically-increasing boundary of equal performance.  
 1025

1026

1027 We can also examine the sign of the second derivative of the boundary function with  
 1028 respect to the equilibrium low-risk fungicide dose. If it is always positive then the curve is  
 1029 convex in  $(C_L^*, C_H^*)$  space; if negative, then the curve is concave; and if zero, then the  
 curve is simply a straight line. Since

1030

$$\frac{d^2 C_H^*}{dC_L^{*2}} = \frac{\omega_L \theta_L^2 (2\omega_L - 1) e^{-\frac{\theta_L C_L^*}{2}}}{\theta_H \left( e^{-\frac{\theta_L C_L^*}{2}} - 2\omega_L \left( e^{-\frac{\theta_L C_L^*}{2}} - 1 \right) \right)^2} \quad 19$$

1031 The sign of the equation is controlled by  $\omega_L$  alone. If less than  $\frac{1}{2}$  the boundary is concave,  
 1032 greater convex and if equal straight. This is because the value of  $\omega_L$  controls whether the  
 1033 low-risk can make up for the increased effect of the high-risk under mixture, in the limit of  
 1034 large amounts of both fungicides. Considering the value of Equation 16 for  $C_H=1$  and  
 1035  $C_L=0$  we see that alternation is always superior at this point, therefore alternation will  
 1036 always perform better above the boundary curve and mixtures below.

1037

1038 **Methods S5 Testing robustness of the result that mixture outperforms alternation**

1039 In order to provide further evidence that the superior performance of mixtures was not  
1040 specific to our chosen parameterisation of the septoria model we carried out the following  
1041 additional test.

- 1042 • Repeat until 1000 parameter value sets are accepted
  - 1043 ○ Choose parameter values uniformly at random from within the ranges of all  
1044 parameters displayed in Figure 7 (note this means that all parameters will  
1045 in general take non-default values)
  - 1046 ○ Check if parameters give realistic solutions and continue if so, otherwise  
1047 generate new parameters. For mixtures and both alternation strategies the  
1048 reality check consists of ensuring:
    - 1049 ▪ that yield is below 95% when the dose of high-risk is zero and the  
1050 dose of low-risk is one;
    - 1051 ▪ that yield is above 95% when a full dose of both high-risk and low-  
1052 risk are applied.
  - 1053 ○ At full dose of the low-risk, find the optimal dose of high-risk and the  
1054 application strategy that gives the largest lifetime yield

1055  
1056 As stated in the main text, no case was found which led to alternation out-performing  
1057 mixture. The volume of parameter space giving realistic solutions was high, in general  
1058 only requiring one or two attempts at parameter value generation to identify a reasonable  
1059 set of parameters (i.e. approximately 50% of parameters tested lead to a realistic  
1060 parameterisation of the model).

1061 **Figure S1** Fitted values of the infection rate parameters in the simpler models including  
1062 fewer epidemiological mechanisms which are used in the sensitivity analysis to model  
1063 structure. The set of mechanisms included in each model is specified by the combination  
1064 of letters H, L and P corresponding to host-limited infection, latent period and phenology,  
1065 respectively (see main text). The HLP model is therefore the full model considered in the  
1066 majority of the main text; the other models appear in Figures 8 and 9. The values of  
1067 infection rate parameters were found by fitting the simpler models to the results of the  
1068 more complex full model at a range of fungicide doses (the procedure for doing this is  
1069 fully described in Methods S2).  
1070

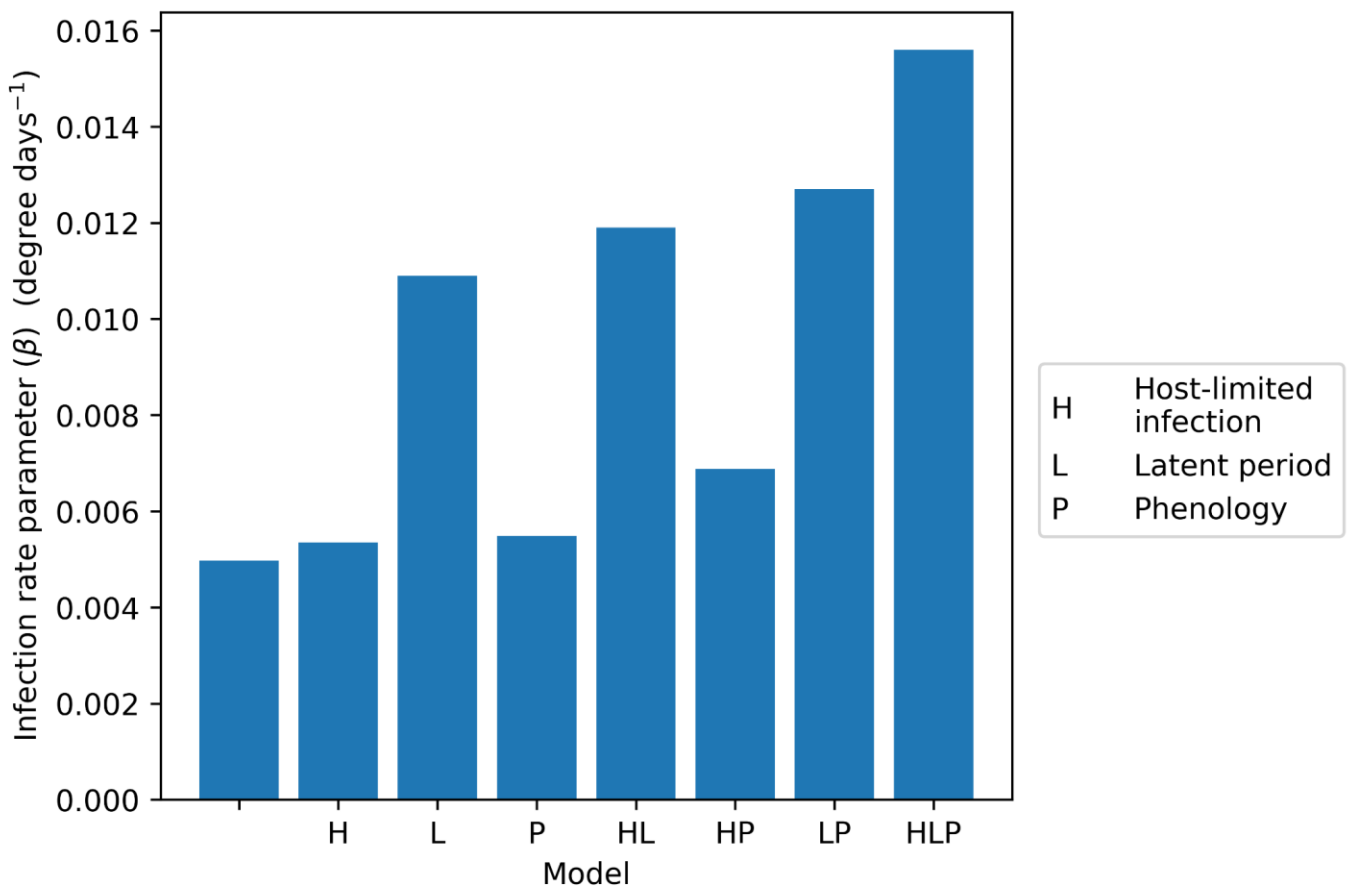

1071

bioRxiv preprint doi: <https://doi.org/10.1101/168831>; this version posted July 27, 2017. The copyright holder for this preprint (which was not certified by peer review) is the author/funder. All rights reserved. No reuse allowed without permission.

1072 **Figure S2** Selection in dose space for a simple exponential growth model with no  
 1073 decay of fungicides, showing whether mixtures or alternation have a smaller  
 1074 cumulative selection coefficient ( $\sigma$ , the time integral of the selection coefficient). Green  
 1075 areas show regions within which mixture performs better, and brown shows regions  
 1076 within which alternation is better. Responses are shown for the simple exponential  
 1077 growth model with non-decaying fungicides (Equation 14; Methods S4). The analytic  
 1078 prediction indicates that in this model the maximum effect of the high-risk fungicide  
 1079 ( $\omega_H$ ) has no effect on relative strategy performance; neither does the underlying  
 1080 pathogen growth rate ( $\beta$ ). The values of the other fungicide parameters – i.e. the  
 1081 maximum effect of low-risk fungicide ( $\omega_L$ ), and the curvature parameters of both  
 1082 fungicides ( $\theta_H$  and  $\theta_L$ ) – therefore control the shape of the response. The first row (**a-**  
 1083 **d**) has  $\omega_L = 0.3$ ; the second row (**e-h**) has  $\omega_L = 0.5$ ; and the third row (**i-l**) has  $\omega_L =$   
 1084  $0.7$ . The first column (**a, e, i**) has  $\theta_H = 3$  and  $\theta_L = 2$ , the second (**b, f, j**) has  $\theta_H = 7$  and  
 1085  $\theta_L = 2$ , the third (**c, g, k**) has  $\theta_H = 3$  and  $\theta_L = 6$ , and the fourth (**d, h, l**) has  $\theta_H = 7$  and  
 1086  $\theta_L = 6$ .

1087

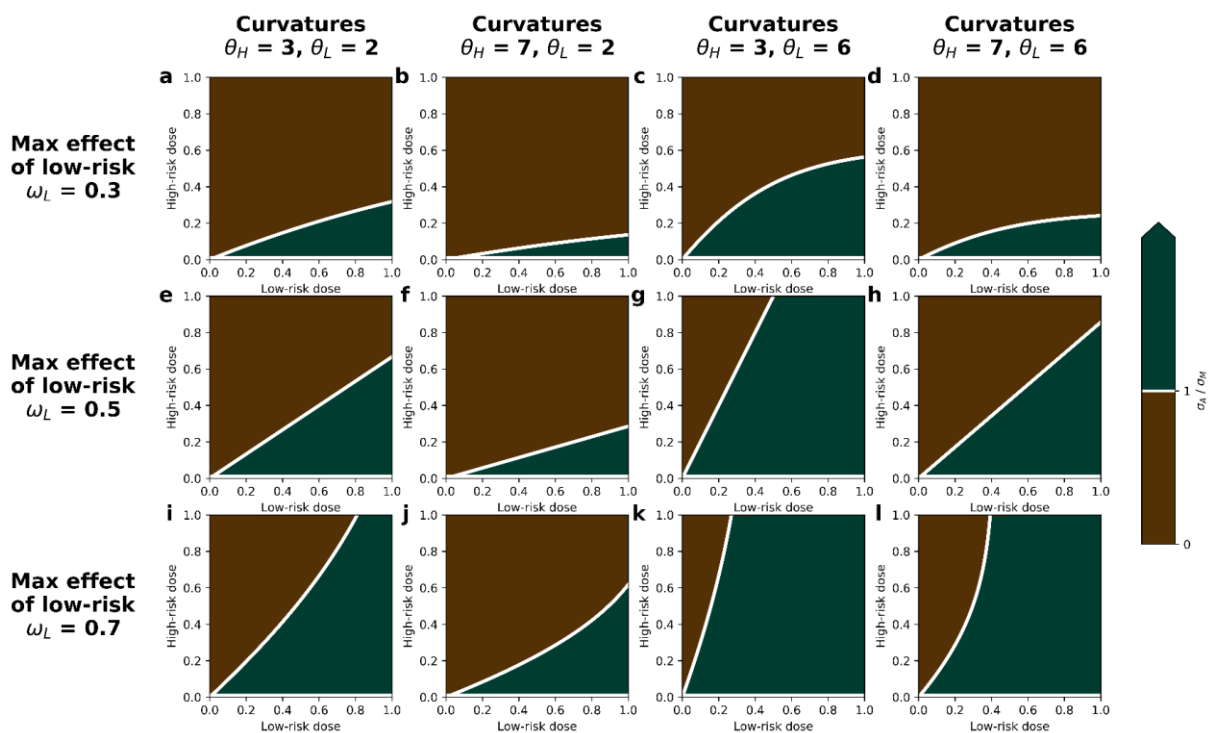

1088

1089

1090 **Table S1** Default parameterisation of the model of septoria leaf blotch on winter wheat.

| Parameter                                                        | Symbol     | Value                                           | Reference                                                              |
|------------------------------------------------------------------|------------|-------------------------------------------------|------------------------------------------------------------------------|
| Infection rate parameter                                         | $\beta$    | $1.56 \times 10^{-2}$ degree-day <sup>-1</sup>  | Fit to output of model of Hobbelen <i>et al.</i> 2013 (see Methods S1) |
| Latent period                                                    | $1/\gamma$ | 266 degree-days                                 | Hobbelen <i>et al.</i> 2013                                            |
| Infectious period                                                | $1/\mu$    | 456 degree-days                                 | Hobbelen <i>et al.</i> 2013                                            |
| High risk fungicide name                                         |            | Pyraclostrobin                                  | Hobbelen <i>et al.</i> 2011                                            |
| High risk fungicide activity                                     |            | Protectant / Eradicant                          | Hobbelen <i>et al.</i> 2011                                            |
| High risk fungicide maximum effect                               | $\omega_H$ | 1                                               | Hobbelen <i>et al.</i> 2011                                            |
| High risk fungicide dose response curvature                      | $\theta_H$ | 9.6                                             | Hobbelen <i>et al.</i> 2011                                            |
| High risk fungicide decay parameter                              | $\delta_H$ | $1.11 \times 10^{-2}$ degree-days <sup>-1</sup> | Hobbelen <i>et al.</i> 2011                                            |
| Low risk fungicide name                                          |            | Chlorothalonil                                  | Hobbelen <i>et al.</i> 2011                                            |
| Low risk fungicide activity                                      |            | Protectant                                      | Hobbelen <i>et al.</i> 2011                                            |
| Low risk fungicide maximum effect                                | $\omega_L$ | 0.48                                            | Hobbelen <i>et al.</i> 2011                                            |
| Low risk fungicide dose response curvature                       | $\theta_L$ | 9.9                                             | Hobbelen <i>et al.</i> 2011                                            |
| Low risk fungicide decay parameter                               | $\delta_L$ | $6.91 \times 10^{-3}$ degree-days <sup>-1</sup> | Hobbelen <i>et al.</i> 2011                                            |
| Initial resistance frequency                                     | $\psi$     | $1 \times 10^{-10}$                             | Assumed (a range of values were tested; see Figure 7h in main text)    |
| Initial inoculum density                                         | $\phi$     | $1.09 \times 10^{-2}$                           | Hobbelen <i>et al.</i> 2011                                            |
| Initial area of susceptible leaf                                 | $S(0)$     | 0.05                                            | Hobbelen <i>et al.</i> 2011                                            |
| Initial area of leaf with latent infection by susceptible strain | $E_S(0)$   | 0                                               | Hobbelen <i>et al.</i> 2011                                            |
| Initial area of leaf with latent infection by resistant strain   | $E_R(0)$   | 0                                               | Hobbelen <i>et al.</i> 2011                                            |
| Initial area of leaf infected by susceptible strain              | $I_S(0)$   | 0                                               | Hobbelen <i>et al.</i> 2011                                            |
| Initial area of leaf infected by resistant strain                | $I_R(0)$   | 0                                               | Hobbelen <i>et al.</i> 2011                                            |
| Initial area of dead leaf                                        | $R(0)$     | 0                                               | Hobbelen <i>et al.</i> 2011                                            |
| Host growth rate parameter                                       | $r$        | $1.26 \times 10^{-2}$ degree-days <sup>-1</sup> | Hobbelen <i>et al.</i> 2011                                            |
| Host carrying capacity                                           | $k$        | 4.2                                             | van den Berg <i>et al.</i> 2013                                        |

bioRxiv preprint doi: <https://doi.org/10.1101/168831>; this version posted July 27, 2017. The copyright holder for this preprint (which was not certified by peer review) is the author/funder. All rights reserved. No reuse allowed without permission.

|                                                           |                     |                                               |                                                            |
|-----------------------------------------------------------|---------------------|-----------------------------------------------|------------------------------------------------------------|
| Decay rate of primary inoculum                            | $\nu$               | $8.5 \times 10^{-3} \text{ degree-days}^{-1}$ | Hobbelen <i>et al.</i> 2011                                |
| Spray times                                               |                     | GS32, GS39                                    | Hobbelen <i>et al.</i> 2014;<br>Paveley <i>et al.</i> 2014 |
| Time of emergence of leaf 5                               | $T_{\text{EMERGE}}$ | 1212 degree days                              | van den Berg <i>et al.</i> 2013                            |
| Time of GS32                                              | $T_{\text{GS32}}$   | 1456 degree days                              | van den Berg <i>et al.</i> 2013                            |
| Time of GS39                                              | $T_{\text{GS39}}$   | 1700 degree days                              | van den Berg <i>et al.</i> 2013                            |
| Time of GS61                                              | $T_{\text{GS61}}$   | 2066 degree days                              | van den Berg <i>et al.</i> 2013                            |
| Time of GS87                                              | $T_{\text{GS87}}$   | 2900 degree days                              | van den Berg <i>et al.</i> 2013                            |
| Initial area of lower leaf infected by resistant strain   | $P_R(0)$            | $\psi\phi$                                    | Derived                                                    |
| Initial area of lower leaf infected by susceptible strain | $P_S(0)$            | $(1-\psi)\phi$                                | Derived                                                    |

1091

1092

**Table S2** Default parameterisation of the model of powdery mildew on grapevine

| Parameter                                                        | Symbol      | Value                                   |                                         | Reference                                                              |
|------------------------------------------------------------------|-------------|-----------------------------------------|-----------------------------------------|------------------------------------------------------------------------|
| Infection rate parameter                                         | $\beta$     | 1.605 cm <sup>2</sup> day <sup>-1</sup> | 1.688 cm <sup>2</sup> day <sup>-1</sup> | Burie <i>et al.</i> 2011                                               |
| Latent period                                                    | 1/ $\gamma$ | 10 days                                 |                                         | Burie <i>et al.</i> 2011                                               |
| Infectious period                                                | 1/ $\mu$    | 10 days                                 |                                         | Burie <i>et al.</i> 2011                                               |
| High risk fungicide name                                         |             | Trifloxystrobin                         |                                         |                                                                        |
| High risk fungicide activity                                     |             | Protectant / Eradicant                  |                                         |                                                                        |
| High risk fungicide maximum effect                               | $\omega_H$  | 1                                       |                                         | Assumed                                                                |
| High risk fungicide dose response curvature                      | $\theta_H$  | 4.88                                    |                                         | Fitted to data from Reuveni 2001 (see Methods S3)                      |
| High risk fungicide decay parameter                              | $\delta_H$  | 0.231                                   |                                         | Taken from range of values in Jyot <i>et al.</i> 2010 (see Methods S3) |
| Low risk fungicide name                                          |             | Sulphur                                 |                                         |                                                                        |
| Low risk fungicide activity                                      |             | Protectant / Eradicant                  |                                         |                                                                        |
| Low risk fungicide maximum effect                                | $\omega_L$  | 1                                       |                                         | Assumed                                                                |
| Low risk fungicide dose response curvature                       | $\theta_L$  | 1.02                                    |                                         | Fitted to data from Reuveni 2001 (see Methods S3)                      |
| Low risk fungicide decay parameter                               | $\delta_L$  | 0.173 days <sup>-1</sup>                |                                         | Taken from range of values in Nasr 2010 (see Methods S3)               |
| Initial resistance frequency                                     | $\psi$      | 1 x 10 <sup>-10</sup>                   |                                         | Assumed                                                                |
| Initial inoculum density                                         | $\phi$      | 0.13 cm <sup>2</sup>                    |                                         | Burie <i>et al.</i> 2011                                               |
| Initial area of susceptible leaf                                 | $S(0)$      | 42.34 cm <sup>2</sup>                   |                                         | Burie <i>et al.</i> 2011                                               |
| Initial area of leaf with latent infection by susceptible strain | $E_S(0)$    | (1- $\psi$ ) $\phi$                     |                                         | Derived                                                                |
| Initial area of leaf with latent infection by resistant strain   | $E_R(0)$    | $\psi\phi$                              |                                         | Derived                                                                |
| Initial area of leaf infected by susceptible strain              | $I_S(0)$    | 0 cm <sup>2</sup>                       |                                         | Burie <i>et al.</i> 2011                                               |
| Initial area of leaf infected by resistant strain                | $I_R(0)$    | 0 cm <sup>2</sup>                       |                                         | Burie <i>et al.</i> 2011                                               |
| Initial area of dead leaf                                        | $R(0)$      | 0 cm <sup>2</sup>                       |                                         | Burie <i>et al.</i> 2011                                               |
| Host growth rate parameter                                       | $r$         | 0.147 days <sup>-1</sup>                | 0.032 days <sup>-1</sup>                | Burie <i>et al.</i> 2011                                               |



bioRxiv preprint doi: <https://doi.org/10.1101/168831>; this version posted July 27, 2017. The copyright holder for this preprint (which was not certified by peer review) is the author/funder. All rights reserved. No reuse allowed without permission.

|                                              |           |                          |                                            |                              |
|----------------------------------------------|-----------|--------------------------|--------------------------------------------|------------------------------|
| Host carrying capacity                       | $k$       | 26106<br>cm <sup>2</sup> | 2.461 x<br>10 <sup>8</sup> cm <sup>2</sup> | Burie <i>et al.</i> 2011     |
| Spray times                                  |           | Days 161, 174            |                                            | Assumed                      |
| Initial area of ontogenically resistant leaf | $O(0)$    | 0 cm <sup>2</sup>        |                                            | Burie <i>et al.</i> 2011     |
| Rate of ontogenic resistance development     | $m$       | 0.1 days <sup>-1</sup>   |                                            | Burie <i>et al.</i> 2011     |
| Time of end of simulation                    | $T_{END}$ | Day 230                  |                                            | Assumed                      |
| Time of primary infection                    | $T_{INF}$ | Day 119                  |                                            | Mammeri <i>et al.</i> , 2014 |
| Time of flowering                            | $T_{FLO}$ | Day 163                  |                                            | Mammeri <i>et al.</i> , 2014 |
| Time of shoot topping                        | $T_{TOP}$ | Day 173                  |                                            | Mammeri <i>et al.</i> , 2014 |
| % leaf area lost on topping                  |           | 20%                      |                                            | Burie <i>et al.</i> 2011     |

1094

1095

1096 **Bibliography for the Supporting Information**

1097

1098 **van den Berg F, van den Bosch F, Paveley ND. 2013.** Optimal fungicide application  
1099 timings for disease control are also an effective anti-resistance strategy: a case study  
1100 for *Zymoseptoria tritici* (*Mycosphaerella graminicola*) on wheat. *Phytopathology* **103**:  
1101 1209–19.

1102 **Burie J, Langlais M, Calonnec A. 2011.** Switching from a mechanistic model to a  
1103 continuous model to study at different scales the effect of vine growth on the dynamic  
1104 of a powdery mildew epidemic. *Annals of Botany* **107**: 885–895.

1105 **Hobbelen PHF, Paveley ND, van den Bosch F. 2011.** Delaying selection for  
1106 fungicide insensitivity by mixing fungicides at a low and high risk of resistance  
1107 development: a modeling analysis. *Phytopathology* **101**: 1224–33.

1108 **Hobbelen PHF, Paveley ND, van den Bosch F. 2014.** The emergence of resistance  
1109 to fungicides. *PLoS ONE* **9**: e91910.

1110 **Hobbelen PHF, Paveley ND, Oliver RP, van den Bosch F. 2013.** The usefulness of  
1111 fungicide mixtures and alternation for delaying the selection for resistance in  
1112 populations of *Mycosphaerella graminicola* on winter wheat: a modeling analysis.  
1113 *Phytopathology* **103**: 690–707.

1114 **Jyot G, Arora PK, Sahoo SK, Singh B, Battu RS. 2010.** Persistence of  
1115 Trifloxystrobin and Tebuconazole on Grape Leaves, Grape Berries and Soil. *Bull*  
1116 *Environ Contam Toxicol* **84**: 305–310.

1117 **Mammeri Y, Burie JB, Langlais M, Calonnec A. 2014.** How changes in the dynamic  
1118 of crop susceptibility and cultural practices can be used to better control the spread of  
1119 a fungal pathogen at the plot scale? *Ecological Modelling* **290**: 178–191.

1120 **Nasr IN. 2010.** Gas Chromatographic Determination of Sulfur Residues in Tomatoes  
1121 and Squash Fruits. *Journal of Applied Sciences Research* **6**: 1474–1476.

1122 **Paveley N, Blake J, Gladders P, Cockerell V. 2014.** *The wheat disease*  
1123 *management guide*. United Kingdom: Home-Grown Cereals Authority.

1124 **Reuveni M. 2001.** Activity of trifloxystrobin against powdery and downy mildew  
1125 diseases of grapevines. *Canadian Journal of Plant Pathology* **23**: 52–59.

1126
